# Supplementary material for: Differences in experiences of care between patients diagnosed with metastatic cancer of known and unknown primaries: mixed-method findings from the 2013 cancer patient experience survey in England
Source: PubMed Central journal article supplement (PMC5623509; doi:10.1136/bmjopen-2017-017881), 2017-09-27
Supplement: bmjopen-2017-017881.draft_revisions.pdf [file bmjopen-2017-017881.draft_revisions.pdf]

# BMJ Open

BMJ Open is committed to open peer review. As part of this commitment we make the peer review history of every article we publish publicly available.

When an article is published we post the peer reviewers' comments and the authors' responses online. We also post the versions of the paper that were used during peer review. These are the versions that the peer review comments apply to.

The versions of the paper that follow are the versions that were submitted during the peer review process. They are not the versions of record or the final published versions. They should not be cited or distributed as the published version of this manuscript.

BMJ Open is an open access journal and the full, final, typeset and author-corrected version of record of the manuscript is available on our site with no access controls, subscription charges or pay-per-view fees (<http://bmjopen.bmj.com>).

If you have any questions on BMJ Open's open peer review process please email [editorial.bmjopen@bmj.com](mailto:editorial.bmjopen@bmj.com)

# BMJ Open

## The unique needs of Cancer of Unknown Primary (CUP) respondents identified by the Cancer Patient Experience Survey (2013)

|                                 |                                                                                                                                                                                                                                                                                                                                                                                                                                                                                                                                                                                                               |
|---------------------------------|---------------------------------------------------------------------------------------------------------------------------------------------------------------------------------------------------------------------------------------------------------------------------------------------------------------------------------------------------------------------------------------------------------------------------------------------------------------------------------------------------------------------------------------------------------------------------------------------------------------|
| Journal:                        | <i>BMJ Open</i>                                                                                                                                                                                                                                                                                                                                                                                                                                                                                                                                                                                               |
| Manuscript ID                   | bmjopen-2017-017881                                                                                                                                                                                                                                                                                                                                                                                                                                                                                                                                                                                           |
| Article Type:                   | Research                                                                                                                                                                                                                                                                                                                                                                                                                                                                                                                                                                                                      |
| Date Submitted by the Author:   | 25-May-2017                                                                                                                                                                                                                                                                                                                                                                                                                                                                                                                                                                                                   |
| Complete List of Authors:       | Wagland, Richard; University of Southampton, Faculty of Health Sciences<br>Bracher, Michael ; Bournemouth University, Department of Health and Social Sciences<br>Drosdowsky, Allison ; Peter MacCallum Cancer Institute, Department of Cancer Experiences Research<br>Richardson, Alison; University of Southampton, Faculty of Health Sciences<br>Symons, John; Cancer of Unknown Primary CUP Foundation Jo's Friends, Director<br>Mileshkin, Linda; Peter MacCallum Cancer Institute, Division of Cancer Medicine<br>Schofield, Penelope ; The University of Melbourne; Swinburne University of Technology |
| <b>Primary Subject Heading</b>: | Oncology                                                                                                                                                                                                                                                                                                                                                                                                                                                                                                                                                                                                      |
| Secondary Subject Heading:      | Epidemiology, Health services research                                                                                                                                                                                                                                                                                                                                                                                                                                                                                                                                                                        |
| Keywords:                       | Cancer of unknown primary, Patient experience, Communication, Health services research                                                                                                                                                                                                                                                                                                                                                                                                                                                                                                                        |
|                                 |                                                                                                                                                                                                                                                                                                                                                                                                                                                                                                                                                                                                               |

SCHOLARONE™  
Manuscripts

**The unique needs of Cancer of Unknown Primary (CUP) respondents identified by the Cancer Patient Experience Survey (2013)**

**Dr Richard Wagland**, Senior Research Fellow, Faculty of Health Sciences, University of Southampton, UK

**Dr Mike Bracher**, Research Fellow, Faculty of Health and Social Sciences, Dept. of Human Sciences and Public Health, Bournemouth University, UK.

**Dr Allison Drosdowsky**, Researcher, Department of Cancer Experiences Research, Peter MacCallum Cancer Centre, Melbourne, Australia

**Prof. Alison Richardson**, Professor of Cancer Nursing and End of Life Care & Director - Southampton Academy of Research, University of Southampton & University Hospital Southampton NHS Foundation Trust, UK.

**Dr John Symons**, Director, Cancer of Unknown Primary Foundation, United Kingdom

**Dr Linda Mileshkin**, Medical Oncologist, Division of Cancer Medicine, Peter MacCallum Cancer Centre, Melbourne, Australia

**Prof. Penny Schofield**, Department of Psychology, Swinburne University of Technology, Melbourne, Australia

**Acknowledgements:** We would like to thank Dr Karla Gough, Senior Research Fellow, Department of Cancer Experiences Research, Peter MacCallum Cancer Centre, who assisted with analysis.

**Corresponding Author:**

Dr Richard Wagland, Senior Research Fellow, Faculty of Health Sciences, Building 67, Highfield, Southampton, SO17 1BJ.

Tel: 023 8059 7868

Email: [R.Wagland@soton.ac.uk](mailto:R.Wagland@soton.ac.uk)

**Word count:** Abstract: 299; Manuscript: 3983

**Key words:** Cancer of unknown primary; oncology; patient experience; Health service research; communication

**Data sharing agreement:** Source data for the study are closed question responses and free-text responses to the Cancer Patient Experience Survey in England for 2013. These data are available from the survey provider (Quality Health, UK) <https://www.quality-health.co.uk/>—email: [info@quality-health.co.uk](mailto:info@quality-health.co.uk).

**Contributorship statement:** PS, RW and AR conceived the idea of the study and acquisition of the data. PS was responsible for the design of the quantitative study, RW for design of the qualitative study. AD was responsible for undertaking quantitative data analysis; MB and RW were responsible for undertaking analysis of qualitative data. PS, LM, AR, JS, AD, MB and RW were all involved with interpretation of the results from both studies. The initial draft of the paper was produced by RW and MB, and circulated repeatedly between all authors for critical revision. All authors read and approved the final manuscript.

1  
2  
3 **Objectives:** To explore differences in experiences of care reported in the Cancer Patient Experience  
4 Survey (CPES) between patients with Cancer of Unknown Primary (CUP) and those with metastatic  
5 disease of known primary (non-CUP); to determine insights pertaining to the experiences of care for  
6 CUP respondents from free-text comments.  
7

8  
9 **Design:** Two separate, but related, studies, involving secondary analysis of existing data. Using  
10 frequency matching of CUP and non-CUP patients, statistical comparisons of responses to CPES  
11 questions were conducted. Free text comments from CUP respondents were analysed thematically.  
12

13 **Setting and participants:** The CPES questionnaire comprises 63 closed questions measuring eight  
14 areas that relate to experience of care and three free-text questions. Questionnaires were mailed to  
15 all adult patients (aged  $\geq 16$  years) in England with cancer admitted to hospital between 01/09/13-  
16 30/11/13.  
17

18  
19 **Results:** Matched analysis of closed response items from 2992 patients found significant differences  
20 between CUP (n=1496) and non-CUP patients (n=1496): CUP patients were more likely to want more  
21 written information about their type of cancer and tests received, to receive their diagnosis from a  
22 GP and have seen allied health professionals, but less likely to have understood explanations of their  
23 condition or had surgery. Free-text responses (n=3055) were coded into seventeen categories, and  
24 provided deeper insight regarding patient information and interactions with GPs. CPES data may  
25 include a preponderance of patients with favourable CUP sub-types, and patients initially identified  
26 as CUP but whose primary was subsequently identified.  
27  
28

29  
30 **Conclusions:** These are the first large-scale studies to explore the experiences of care of CUP  
31 patients. The significant differences identified between the experiences of CUP and non-CUP  
32 patients suggest CUP patients require more psychosocial support and specific interventions to  
33 manage diagnostic uncertainty and the multiple investigations many CUP patients face. Substantial  
34 limitations were identified with the CPES data, emphasising the need for prospective studies.  
35  
36  
37  
38

#### 39 **Strengths and limitations of this study:**

- 40 • Secondary analysis conducted on large-scale, quantitative and qualitative datasets of
- 41 the health-care experiences of CUP patients;
- 42 • Inadequate information provision and delayed GP specialist referral emerged as
- 43 convergent themes;
- 44 • Significant limitations were identified that should be considered by any study
- 45 specifically recruiting CUP patients to a retrospective survey
- 46 • These limitations highlight the need for prospective, observational cohort studies to
- 47 investigate the experiential, informational and psychosocial issues faced by CUP
- 48 patients.
- 49
- 50
- 51
- 52
- 53
- 54
- 55
- 56
- 57
- 58
- 59
- 60

## INTRODUCTION

Patients with cancer of unknown primary (CUP) have metastatic malignant disease, for which an identifiable primary site has not been identified after extensive clinical evaluation. CUP is not a single disease, but rather a heterogeneous collection of cancer types with a wide variety of clinical presentations, which are hypothesised to share a common tendency to metastasise early [1]. CUP was the 5<sup>th</sup> most common cancer in the UK in 2014, accounting for 3% of new cancers and 6% of cancer deaths [2]. World-wide it has been identified as between the 6<sup>th</sup> to 8<sup>th</sup> most common cancer, accounting for 2.3%-5% of all new cancer cases, and is the 3<sup>rd</sup> to 4<sup>th</sup> most common cause of death [3,4]. The UK National Institute of Clinical Excellence (NICE) published guidelines for the management of CUP patients in 2010 [5], which for the first time developed a taxonomy of definitions that reflected different phases of investigations for CUP: malignancy of undefined primary origin (MUO); provisional CUP (pCUP), and: confirmed CUP (Table 1). The guidelines also recommended the establishment of specialist CUP multi-disciplinary team (MDTs) in each National Health Service (NHS) cancer centre, to include an oncologist, palliative care physician and clinical nurse specialist (CNS) [5].

However, with the exception of three previous studies [6–8], there is very little published research on quality of life (QoL) and psychosocial aspects of CUP. Patients with CUP struggle with uncertainty and distress, especially regarding prognosis [6], possible recurrence, and the primary's hereditary potential [7]. Problems with care continuity commonly faced by cancer patients were amplified for those with CUP, particularly in relation to coordination, accountability and timeliness of care [7]. A recent cross-sectional study from Greece, using matched-sample analysis, found patients with CUP experienced higher depression and anxiety, and poorer QoL compared with those who have metastatic disease of either breast or colorectal cancer [8].

These findings suggest CUP patients may have unique psychosocial and supportive care needs, which require development of targeted supportive care interventions. Internationally, routine assessments of patient experiences of care are used increasingly to drive service quality improvements [9,10]. In the UK, the NHS Cancer Reform Strategy [11], Outcomes Strategy for Cancer [12] and recent Cancer Taskforce [13] documents highlight the important role of patient experiences in measuring and improving clinical quality. The national Cancer Patient Experience Survey (CPES) is an extensive, UK-wide programme of research about cancer patients' experiences of care whilst undergoing inpatient or day-case treatment [14]. The CPES has been administered annually since 2010, and is the biggest survey programme of its kind in the world. The data are a public resource and available from the survey provider, Quality Health. This represented an opportunity to interrogate these data to understand CUP patients' experiences of care to underpin the development of targeted care interventions for this population.

Drawing from the 2013 CPES, this paper reports findings from two related studies: qualitative and quantitative. The aim of both studies was to better understand the experiences of care amongst CUP patients. The quantitative study described perceived experiences of care of patients diagnosed with CUP compared to patients with metastatic cancer of a comparable known primary (non-CUP). The second, qualitative study analysed free-text responses of CUP patients in the CPES, to identify emerging themes and insights regarding their experiences of cancer care.

## METHODS

## Survey design

The two studies reported here consist of secondary analyses of data collected as part of the English 2013 CPES, to assess differences in responses between CUP and non-CUP patients, and to explore free-text responses of patients with CUP.

The 2013 CPES was administered by the survey provider, Quality Health. The CPES questionnaire was mailed to all adult patients (aged  $\geq 16$  years) in England with a diagnosis of cancer, who had been admitted to an NHS hospital as an inpatient or day case patient over a three-month period (01/09/13-30/11/13). Non-responders were sent one reminder letter and a further reminder letter with questionnaire if necessary. The overall response rate for the 2013 CPES was 64% (n=68,737) [14].

## Survey instrument

The CPES instrument contained 63 closed question items, measuring eight key areas of patient experience across the care trajectory from diagnosis to leaving hospital: access to care; respect for patients' preferences; information and education; physical comfort; emotional support; involvement of family and friends; continuity and transition, and; coordination of care. Three free-text comment boxes at the end of the questionnaire asked the following questions: *Was there anything particularly good about your NHS care? Was there anything that could be improved? Any other comments?*

## Identification of respondents

All NHS hospitals treating adult patients with cancer in England were included. Patients were identified from data provided by these organisation, selected from local patient administration systems. Patients were identified as CUP using the tenth revision of the International Statistical Classification of Diseases and Related Problems (ICD-10) codes: C77 (Secondary and unspecified malignant neoplasm of lymph nodes), C78 (Secondary malignant neoplasm of respiratory and digestive organs), C79 (Secondary malignant neoplasm of other and unspecified sites), and C80 (Malignant neoplasm, without specification of site) [15].

## ANALYSIS

### Frequency matching analysis: Matching procedure

A frequency matching analysis was conducted to compare responses to the closed survey questions between CUP and non-CUP respondents. 4,535 CPES (2013) respondents were identified as CUP patients. The original plan was to match CUP and non-CUP samples for analysis on three variables: age group in deciles, sex and type of admission (ordinary admission, day case admission or regular day case admission). After exploration of the data, two further variables needed to be accounted for: tumour type and time since treatment start. Prevalence of breast and prostate cancer were high amongst non-CUP respondents to the CPES questionnaire, and it seemed inappropriate to match the CUP sample against a high proportion of such patients given estimates of likely site of origin in CUP cases from autopsy and biomarker studies [16]. For this reason the dataset was restricted so these two tumour types represented only 5% each in the known primary sample. Preliminary analysis also found a marked difference between the CUP and non-CUP respondents regarding time since commencing cancer treatment (Fig 1). Patients with CUP were found disproportionately to have

1  
2  
3 commenced treatment >1 year prior to the survey (34% of CUP Vs. 73% of non-CUP); many more  
4 than would normally be expected amongst a random CUP sample and suggests a high proportion of  
5 favourable CUP sub-types [4]. Due to the small proportion of non-CUP patients who responded that  
6 it had been longer than one year since they began treatment, it was impossible to match on this  
7 variable, so the sample was restricted to only those patients who responded 'less than one year'.  
8  
9

10 The final sample included 1496 CUP patients who began treatment in the past year, with no missing  
11 data on the matching variables (age, sex and administration type). All patients were assigned IDs and  
12 CUP patients were matched with randomly selected non-CUP patients, who had no missing data on  
13 the matching variables, began treatment in the past year and were diagnosed with metastatic  
14 disease in specific tumour types (colorectal, breast, head and neck, kidney/adrenal, prostate,  
15 pancreas, and upper and lower gastrointestinal). These sites were selected as the primary sites from  
16 which CUP is most commonly thought to arise [16]. The final combined dataset contained 2,992  
17 respondents (Table 2).  
18  
19

### 20 **Frequency matching analysis: Analysis**

21  
22 Chi-squared tests assessed associations between diagnosis type (CUP vs. non-CUP) and responses to  
23 each item. Given the very large sample, the likelihood of finding statistically significant associations  
24 at  $p < 0.05$  was high. It was therefore determined *a priori* that a phi coefficient  $> 0.1$  would be  
25 classified as a meaningful difference in responses between CUP and non-CUP, as this corresponds to  
26 a 'small' or greater effect [17].  
27  
28

### 29 **Free-text analysis**

30  
31 Free-text responses provided by patients diagnosed with CUP were analysed to provide insights into  
32 their experiences of care. Comments were extracted from the CPES data set as individual text files  
33 and loaded into the NVivo qualitative data analysis software package. A coding framework for  
34 sorting free-text data from a previous study of responses to the Welsh CPES 2013 (WCPES) [18] was  
35 utilised. A sample of 200 randomly selected comments were double-coded by two researchers (MB,  
36 RW) to ensure compatibility of the framework. Coding agreement between the two researchers was  
37 80% (Cohen's Kappa). Any conflicts were resolved through discussion between coders. The  
38 framework was then used to categorise the free text comments. Search criteria were developed for  
39 each category, using terms gleaned from term-frequency and unique terms analyses of the coded  
40 data from the WCPES study. The search strategy was designed to identify relevant comments for  
41 each theme. Following categorisation of comments, a second level of thematic analysis was  
42 conducted on specific free-text categories to provide greater depth of insight [19].  
43  
44  
45  
46  
47

### 48 **Ethics and data management**

49 CPES data is a public resource and available from the survey provider, Quality Health. Data were  
50 anonymised and secondary analysis of closed questions permitted with agreement from NHS  
51 England. Because free-text data may contain personal identifiable data, approval from NHS England  
52 to analyse CPES free-text data was separately secured. Free-text analysis of CPES data was approved  
53 by the University of Southampton ethics committee on 12/11/14 (UoS Ethics ID:12313).  
54  
55

### 56 **FINDINGS**

### Patient experiences: closed responses

The demographic and clinical characteristics for the matched CUP and non-CUP samples are shown in Table 2. Sixty comparisons were conducted. Seven items showed differences between the CUP and non-CUP respondents. Of these, six were classified as meaningfully different (table 3). In response to question 8 ('Beforehand, were you given written information about your [diagnostic] tests?'), CUP patients were more likely to respond 'No, but I would have liked written information about the test/s' or 'I did not need written information' and less likely to respond 'Yes, and it was easy to understand'. In response to Q10 ('Who first told you that you had cancer?'), CUP participants were more likely to respond 'A GP', and less likely to respond 'A hospital nurse', with similar proportions indicating 'a hospital doctor'. In relation to Q13 ('Did you understand the explanation of what was wrong with you?'), CUP patients were less likely to answer 'Yes, I completely understood it' and more likely to respond 'Yes, I understood some of it' or 'No, I did not understand it'. Finally, CUP patients were less likely to report having had surgery in the past 12 months (Q32), and more likely to report having received treatment from a lymphoedema specialist (Q66).

### Patient experiences: Free-text

3055 CUP patients provided comments to one or more of the three free-text questions. The mean length of comments was 64.2 words, with female respondents providing longer comments than male respondents (54.2 words and 69.9 words respectively). Comments were retrieved from the dataset for seventeen categories (Table 4). Positive comments were predominant in eight categories ('manner of staff communication'; 'consultants'; 'Nursing'; 'Clinical Nurse Specialists'; 'chemotherapy'; 'radiotherapy'; 'surgery'; and 'palliative care'). Predominantly negative comments were provided by participants for the remaining nine categories ('inter-agency communication'; 'waiting for appointments/investigations'; 'waiting on the day'; 'receiving results of investigations'; 'GPs'; 'Accident & Emergency'; 'emotional, social and psychological needs'; 'financial concerns'; and post-treatment care'). Ratios of negative to positive comments varied widely between categories, with the greatest proportion of negative comments reported for 'waiting time on the day', while the greatest proportion of positive comments was for 'palliative care' (though numbers were small). A trend existed within all themes that positive comments tended to be of a more general quality and scope than negative comments. Essentially, if participants were reporting a negative experience they provided more detail.

Three of the six closed questions for which responses between CUP and non-CUP patients showed significant differences (Q10, Q13 and Q14) broadly mapped against particular free-text categories. Comments in these categories were subsequently thematically analysed in greater depth.

### Patient information support from health professionals

When investigated further, comments pertaining to staff-patient communication (n=310) provided insights on patient responses to both closed questions Q13 and Q14; whether patients understood explanations given of their condition, and; whether they were provided with sufficient written information about their cancer or tests received. This free-text category had a net ratio of positive comments (0.4:1), but several themes were identified amongst negative comments (n=89) that indicated why patients found explanations of their condition difficult to understand and why they



1  
2  
3 needed more information. For example, CUP patients related their difficulty understanding why  
4 clinicians were unable to locate the primary tumour site, despite several investigations:  
5

6 *I had 2 liver biopsies (the first one did not have sufficient to discern whether benign or*  
7 *malignant). I had a scan whilst in hospital, also a CT scan and an MRI scan. On my discharge,*  
8 *I later received an appointment for an endoscopy when 2 small nodules were discovered in*  
9 *the gullet, a biopsy was taken – they were benign, the tumour on the liver is a secondary and*  
10 *they still do not know where the primary is. (Female, 64 years).*

11  
12  
13 Patients were sometimes therefore uncertain or confused with regards the type of cancer they had  
14 and alluded to the frustration of not knowing:  
15

16 *'Further detailed information of my cancer needed. Exactly where secondaries are and what*  
17 *kind of problems they could cause. Not knowing can be most distressing as you try to second*  
18 *guess things too much. (Female, 72 years).'*

19  
20  
21 Some patients wished to receive more information with regards what to expect from the diagnosis,  
22 but moreover, wanted an opportunity to discuss what this meant for them:  
23

24 *'I would have liked to have had information about how my type of cancer usually progresses,*  
25 *plus a care plan for my own case. I would have liked to have had a chat, as a matter of*  
26 *course, to someone about the practical side of having cancer.'* (Male, 71 years)

27  
28  
29 Nevertheless, despite receiving explanations of their conditions from health professionals, patients  
30 sometimes reported difficulties with understanding the terminology used:  
31

32 *'The surgeon I see cannot explain things without using clinical terms I do not understand. He*  
33 *could if he tried! And so often I do not understand the detail. In addition he is relatively*  
34 *emotionless.'* (Female, 57 years)

35  
36  
37 In addition, patients sometimes reported receiving conflicting information from the many doctors  
38 involved in their care:  
39

40 *'Sometimes difficult to get answers as too many doctors and nurses dealing with me and not*  
41 *passing on the relevant information and then having to explain it all over again. (This*  
42 *happened many times).'* (Male, 68 years)

43  
44  
45 Several clinicians could be involved with a CUP patient's care, leading to conflicting information, as  
46 they were sometimes passed between clinical teams, as this comment suggests:  
47

48 *The only thing that could be improved was because it was a process of elimination I went*  
49 *from chest specialist, to organ oncologist and after my scans and biopsies finally back to my*  
50 *breast oncologist of 11 years ago. So my treatment didn't start until end of March – 6*  
51 *months later. (Female, 62 years).*

#### 52 53 54 **General Practitioners' diagnosis of CUP**

55  
56 Analysis of closed items indicated CUP patients were more likely than non-CUP patients to be given  
57 their diagnosis by a GP. Analysis of comments regarding interactions with GPs (n=311) provided by  
58  
59  
60

1  
2  
3 participants found. CUP patients were more likely to report negative rather than positive  
4 experiences with GPs (ratio of 2.4:1). The theme containing most comments concerning GPs related  
5 to *speed of diagnosis/referral for further investigations*. Negative comments often indicated months  
6 and sometimes years of consulting GP services with cancer symptoms before diagnosis and/or  
7 referral:  
8

9  
10 *I wish my original GP had listened properly over the months I complained about weight loss*  
11 *(over 2 stone). Instead I had to change my GP who fast tracked me into hospital where a scan*  
12 *showed metastasized tumours. (Female, 81 years)*  
13

14 Comments often related delayed referrals as a consequence of GPs attributing symptoms to  
15 conditions other than cancer or giving insufficient regard to previous cancer diagnoses. Comments  
16 described 'misdiagnosis' of symptoms later found to be inaccurate.  
17

18  
19 *Very upset that I have to call the GP, a couple of times a week for 5 weeks, my pain getting*  
20 *worse by the day. My wife asked on a couple of visits if I could have x-ray, blood tests, GP*  
21 *said nothing wrong with me, it was just back ache. In the end my wife took me to A&E. She*  
22 *had to get me into wheelchair from the car. I was in terrible pain. (Male, 79 years)*  
23

24 Communication between GP and secondary care services was also a prevalent theme within the 'GP'  
25 category, and revealed a lack of continuity between GP and secondary care. It is important to note  
26 that these comments were often not critical of GP services, but of the information provided to them  
27 by secondary services.  
28

29  
30 *I should like my GP to be kept informed more quickly of my treatment at hospital. At the*  
31 *moment, information does not get to her quickly enough, so if I want to discuss something*  
32 *with her, she does not have up to date information, sometimes 3-4 weeks behind. (Female,*  
33 *65 years)*  
34

## 35 DISCUSSION

36  
37 To our knowledge, these two investigations represent the first, large-scale studies quantifying the  
38 experiences of people with CUP compared to people with metastatic known primary cancers; and  
39 the first qualitative analysis of free-text comments from participants drawn from a national sample  
40 of CUP patients. Experiences of patients with CUP were broadly similar to those with advanced  
41 metastatic cancer, with the exception of the six areas reported. This might suggest the success of  
42 recommendations advocated by NICE in the UK that relate to the introduction of MDTs and  
43 specialist nurses dedicated to patients with CUP [5], and that equivalent standards of care now exist  
44 irrespective of whether the primary site was known or unknown. However, it is not yet clear how  
45 consistently CUP MDTs have been established across the UK, and it is doubtful they were well  
46 established by 2013.  
47  
48  
49

50 Patients in the CUP sample were significantly more likely to answer they would have liked more  
51 information than the non-CUP sample about the type of cancer they had and the investigations they  
52 underwent, and significantly less likely to understand the explanations of what was wrong with them.  
53 Providing accurate and helpful information and preparing CUP patients for their treatment trajectory  
54 is especially difficult given the uncertainty that pervades this diagnosis. The location of the primary  
55 tumour is the main reference point for treatment decisions and prognostic information [20],  
56 treatment regimens may change several times during a patient's illness trajectory and patients often  
57  
58  
59  
60

1  
2  
3 receive conflicting information from clinicians [7]. Doctors face challenges when communicating with  
4 CUP patients in the face of such uncertainty [20,21], and consequently doctors often experience  
5 discomfort [22]. CUP patients also frequently undergo a greater number of investigations than  
6 patients with a known primary, as clinicians 'chase the primary' [23]. Many doctors prefer to  
7 estimate a primary site on the basis of clinical signs but there is little consistency in the language  
8 used to describe the diagnosis to patients [21]. The number and diversity of health professionals  
9 involved with their care is often greater for CUP than non-CUP patients as they are often reviewed  
10 and moved between multiple multidisciplinary clinical teams [7]. This can result in confusion and  
11 anxiety for patients [6,7].  
12  
13

14  
15 CUP patients were significantly more likely to be first told they had cancer by their GP, compared to  
16 the non-CUP sample. It may be that, as CUP patients are often not adopted by a specific MDT, or are  
17 'bounced' between MDTs [7,24], GPs may take responsibility for relaying the diagnosis to the patient,  
18 on the basis of accumulating evidence. Nevertheless, free-text responses also found CUP patients  
19 were more likely to report negative rather than positive experiences of interactions with GPs (ratio  
20 of 2.4:1), which often related to referrals being delayed as a consequence of GPs attributing  
21 symptoms to conditions other than cancer or not sufficiently investigating patients' health concerns.  
22 CUP patients were significantly less likely to have surgery; by definition patients with CUP are  
23 diagnosed after a primary has metastasised and hence surgery is not usually an option. In contrast,  
24 those patients with an advanced known primary may well have had surgery prior to the discovery of  
25 metastases. Finally, the finding that patients with CUP are more likely to have seen a lymphedema  
26 specialist is difficult to explain and may be an artefact of the limitations of the sample as discussed  
27 below.  
28  
29  
30  
31

32 A major limitation of this study is that the CUP sample is not representative of the profile of patients  
33 with CUP. During 2006-2010, the one-year relative survival for CUP patients in the UK was 16% [25],  
34 yet in this sample 62% of respondents with CUP had begun treatment for their cancer more than  
35 one year previous to their diagnosis. Potentially, many of the patients in the CUP sample may have a  
36 favourable sub-type of CUP: those with likely primary sites that have greater survival rates and  
37 reliable treatments [4], who may be still receiving follow up care at hospital in the years that  
38 followed their original diagnosis. We attempted to control for this potential bias by restricting the  
39 CUP sample to those who were first treated for their cancer less than one year previously.  
40 Nevertheless, these people were still well enough to complete the CPES several months post-  
41 discharge. Speculatively, the CUP sample in this analysis may be more like patients with advanced  
42 known cancer than a CUP sample recruited prospectively after diagnosis of confirmed CUP, which  
43 would have included many more individuals with poorer prognoses. Therefore, a prospectively  
44 recruited sample of CUP patients might have less positive experiences than the CUP sample in this  
45 analysis. Moreover, as we selected patients with a known primary for the non-CUP sample to  
46 approximate proportions of likely site of origin in CUP cases from autopsy and biomarker studies  
47 [16]; we have enriched the non-CUP sample with patients who have poorer prognoses, such as those  
48 with pancreatic and lung cancers. These patients may have less positive experiences than a more  
49 omnibus sample of patients with advanced known primaries.  
50  
51  
52  
53  
54

55 Compounding these issues, the diagnoses used in this study were not self-reported or clinician-  
56 reported, but based on administrative data. The ICD-10 classification system does not differentiate  
57 between MUO, pCUP and cCUP [5]. For CPES, the ICD code was extracted directly from each Trust's  
58  
59  
60

1  
2  
3 administrative data records, and two errors may subsequently occur with this method. First, as ICD  
4 codes are generated by MDT administrators and not by doctors, there may be errors in coding. The  
5 second, more serious, issue is that because no distinction is made in the data capture between MUO,  
6 pCUP and cCUP, it is possible that if a primary site is later confirmed the coding will not be updated  
7 in the administrative file. Errors in classifying CUP are likely to be more pronounced for the CUP  
8 sample due to the uncertainty of whether or when a primary might be found, and because patients  
9 with MUO can pass between several multidisciplinary teams managing different cancer types [7].  
10 Finally, using administrative data to define the CUP sample also fails to account for the patient's  
11 perception of their disease. Indeed, the limited research that exists indicates that patients are often  
12 very confused about a diagnosis of CUP and for many patients clinicians convey a 'best guess'  
13 primary site to direct treatment or access subsidised medical therapy [21]. What and how they are  
14 told of their diagnosis may influence their questionnaire responses.  
15  
16  
17

## 18 CONCLUSION

19  
20 These findings, when combined, suggest CUP patients may experience delays in diagnosis and  
21 specialist referral, and greater uncertainty with regards understanding their diagnosis and be less  
22 prepared for what to expect regarding diagnostic investigations than patients with a known primary  
23 site. These represent specific areas where targeted psycho-educational interventions might be  
24 developed. But, given we identified significant limitations with the CPES CUP sample data, possibly  
25 as a consequence of inconsistent or erroneous coding and neglect of the NICE taxonomy of CUP, it  
26 is crucial to conduct prospective, observational cohort studies to develop a more complete  
27 understanding of the issues faced by CUP patients.  
28  
29  
30  
31  
32  
33  
34  
35  
36

37 **Competing interests:** No conflicts of interest.

38 **Funding statement:** This work was supported by the Cancer of Unknown Primary (CUP) Foundation  
39 and Cancer Australia. Additional funding was provided by the 'Adventures in Research' funding  
40 stream at the University of Southampton.  
41  
42  
43  
44  
45  
46  
47  
48  
49  
50  
51  
52  
53  
54  
55  
56  
57  
58  
59  
60

## REFERENCES

- 1 Greco F, Hainsworth J. Cancer of Unknown Primary Site Cancer. In: DeVita Jr. VT, Lawrence TS, Rosenberg SA, eds. *Cancer: Principles & Practice of Oncology*. Wolters Kluwer, USA 2014.
- 2 Cancer Research UK. Cancer of unknown primary incidence statistics (trends over time). 2017. <http://www.cancerresearchuk.org/health-professional/cancer-statistics/statistics-by-cancer-type/cancer-of-unknown-primary/incidence#heading=Two> (accessed 16 May2017).
- 3 Brewster DH, Lang J, Bhatti LA, *et al*. Descriptive epidemiology of cancer of unknown primary site in Scotland, 1961-2010. *Cancer Epidemiol* 2014;**38**:227–34. doi:10.1016/j.canep.2014.03.010
- 4 Pavlidis N, Pentheroudakis G. Cancer of unknown primary site. *Lancet (London, England)* 2012;**379**:1428–35. doi:10.1016/S0140-6736(11)61178-1
- 5 National Institute for Health and Care Excellence. Metastatic Malignant Disease of Unknown Primary Origin in Adults: Diagnosis and Management. Published Online First: 2010. <https://www.nice.org.uk/guidance/cg104/chapter/1-Guidance>
- 6 Boyland L, Davis C. Patients' experiences of carcinoma of unknown primary site: dealing with uncertainty. *Palliat Med* 2008;**22**:177–83. doi:10.1177/0269216307085341
- 7 Richardson A, Wagland R, Foster R, *et al*. Uncertainty and anxiety in the cancer of unknown primary patient journey: a multiperspective qualitative study. *BMJ Support Palliat Care* 2015;**5**:366–72. doi:10.1136/bmjspcare-2013-000482
- 8 Hyphantis T, Papadimitriou I, Petrakis D, *et al*. Psychiatric manifestations, personality traits and health-related quality of life in cancer of unknown primary site. *Psychooncology* 2013;**22**:2009–15. doi:10.1002/pon.3244
- 9 Black N. *Patient reported outcome measures could help transform healthcare*. 2013. doi:10.1136/bmj.f167
- 10 Lipscomb J, Gotay CC, Snyder CF. Patient-reported Outcomes in Cancer: A Review of Recent Research and Policy Initiatives. *CA Cancer J Clin* 2007;**57**:278–300. doi:10.3322/CA.57.5.278
- 11 DoH. Cancer Reform Strategy. London, UK: : Department of Health 2007. [webarchive.nationalarchives.gov.uk/+/www.dh.../Cancer/DH\\_091120](http://webarchive.nationalarchives.gov.uk/+/www.dh.../Cancer/DH_091120)
- 12 Department of Health. Improving Outcomes : A Strategy for Cancer. Department of Health 2011. [www.dh.gov.uk/publications](http://www.dh.gov.uk/publications)
- 13 The Independent Cancer Taskforce. Achieving World-Class Cancer Outcomes. 2015;:92.
- 14 Quality Health. National Cancer Patient Experience Survey. 2014.
- 15 WHO. WHO | International Classification of Diseases. *WHO* Published Online First: 2017. <http://www.who.int/classifications/icd/en/> (accessed 16 May2017).
- 16 Pentheroudakis G, Golfinopoulos V, Pavlidis N. Switching benchmarks in cancer of unknown primary: From autopsy to microarray. *Eur J Cancer* 2007;**43**:2026–36. doi:10.1016/j.ejca.2007.06.023
- 17 Cohen J. A power primer. *Psychol Bull* 1992;**112**:155–9. doi:10.1037/0033-2909.112.1.155

- 1  
2  
3 18 Bracher M, Corner DJ, Wagland R. Exploring experiences of cancer care in Wales: a thematic  
4 analysis of free-text responses to the 2013 Wales Cancer Patient Experience Survey (WCPES).  
5 *BMJ Open* 2016;**6**:e011830. doi:10.1136/bmjopen-2016-011830  
6  
7 19 Mason J. *Qualitative researching*. SAGE Publications 2002.  
8  
9 20 Ryan RC, Lawlor PG, Walshe JM. Cancer of unknown primary: addressing the communicative,  
10 ethical and medical challenges in clinical practice – a perspective from palliative care and  
11 supportive oncology. *Prog Palliat Care* 2010;**18**:291–6.  
12 doi:10.1179/096992610X12775428636782  
13  
14 21 Karapetis CS, Guccione L, Tattersall MHN, *et al*. Perceptions of cancer of unknown primary  
15 site: a national survey of Australian medical oncologists. *Intern Med J* 2017;**47**:408–14.  
16 doi:10.1111/imj.13373  
17  
18 22 Symons J, James N, Brooks D. Dilemmas in managing patients with cancer of unknown  
19 primary. *Cancer Nurs Pract* 2009;**8**:27–32. doi:10.7748/cnp2009.10.8.8.27.c7307  
20  
21 23 James N, Symons J. Chasing the primary. *Cancer Nurs Pract* 2010;**9**:10–10.  
22 doi:10.7748/cnp.9.7.10.s13  
23  
24 24 Wagland R, Bracher M, Ibanez Esqueda A, *et al*. Experiences of Care of Patients with Cancer  
25 of Unknown Primary ( CUP ): Analysis of the 2010 , 2011-12 & 2013 Cancer Patient Experience  
26 Survey ( CPES ) England : Final Report. Southampton, UK: 2015.  
27  
28 25 NCRAS (National Cancer Registration and Analysis Service). Routes to Diagnosis: Cancer of  
29 Unknown Primary.  
30 2017.[http://ncin.org.uk/publications/data\\_briefings/routes\\_to\\_diagnosis\\_cancer\\_of\\_unknow](http://ncin.org.uk/publications/data_briefings/routes_to_diagnosis_cancer_of_unknown_primary)  
31 [n\\_primary](http://ncin.org.uk/publications/data_briefings/routes_to_diagnosis_cancer_of_unknown_primary) (accessed 16 May2017).  
32  
33  
34  
35  
36  
37  
38  
39  
40  
41  
42  
43  
44  
45  
46  
47  
48  
49  
50  
51  
52  
53  
54  
55  
56  
57  
58  
59  
60

**Table 1 Terms used in NICE guideline to define CUP**

|                                                                   |                                                                                                                                                                                                                                                                       |
|-------------------------------------------------------------------|-----------------------------------------------------------------------------------------------------------------------------------------------------------------------------------------------------------------------------------------------------------------------|
| Malignancy of undefined primary origin (MUO)                      | Metastatic malignancy identified on the basis of a limited number of tests, without an obvious primary site, before comprehensive investigation                                                                                                                       |
| Provisional carcinoma of unknown primary origin (provisional CUP) | Metastatic epithelial or neuro-endocrine malignancy identified on the basis of the histology or cytology, with no primary site detected despite a selected initial screen of investigations, before specialist review and possible further specialised investigations |
| Confirmed carcinoma of unknown primary origin (confirmed CUP)     | Metastatic epithelial or neuro-endocrine malignancy identified on the basis of final histology, with no primary site detected despite a selected initial screen of investigations, specialist review, and further specialised investigations as appropriate           |

Table 2: Demographic and clinical characteristics of the sample are shown in Table 2.

| Observation        | Free-text sample<br>(n=4672) |      | Matched-pair samples (2992) |      |                  |      |
|--------------------|------------------------------|------|-----------------------------|------|------------------|------|
|                    |                              |      | CUP (n=1496)                |      | Non CUP (n=1496) |      |
| Age                |                              |      |                             |      |                  |      |
| Mean (SD)          | 65.3 (11.3)                  |      | 66.5 (11.7)                 |      | 66.6 (11.5)      |      |
| Median (IQR)       | 66 (58, 73)                  |      | 67 (59, 75)                 |      | 67 (59, 75)      |      |
| Range              | 16, 95                       |      | 20, 98                      |      | 23, 94           |      |
| Sex                |                              |      |                             |      |                  |      |
|                    | n                            | %    | n                           | %    | n                | %    |
| Male               | 1121                         | 36.7 | 583                         | 39.0 | 583              | 39.0 |
| Female             | 1934                         | 63.3 | 913                         | 61.0 | 913              | 61.0 |
| Diagnosis          |                              |      |                             |      |                  |      |
| CUP                | 4672                         | 100  | 1496                        | 100  | --               |      |
| Breast             |                              |      | --                          |      | 111              | 7.4  |
| Head and neck      |                              |      | --                          |      | 185              | 12.4 |
| Lung               |                              |      | --                          |      | 271              | 18.1 |
| Pancreatic         |                              |      | --                          |      | 44               | 2.9  |
| Prostate           |                              |      | --                          |      | 52               | 3.5  |
| Renal              |                              |      | --                          |      | 89               | 5.9  |
| Upper and lower GI |                              |      | --                          |      | 744              | 49.7 |



Table 3: Matched paired analysis: CUP and non-CUP patients

| Questions                                                                                                                                                                                                                                                                          | CUP n (%) | Known primary n (%) | Phi   |
|------------------------------------------------------------------------------------------------------------------------------------------------------------------------------------------------------------------------------------------------------------------------------------|-----------|---------------------|-------|
| <b>Q8. Beforehand, were you given written information about your test(s)?</b>                                                                                                                                                                                                      |           |                     |       |
| Yes, and it was easy to understand                                                                                                                                                                                                                                                 | 808 (59)  | 917 (68)            | 0.102 |
| Yes, but it was difficult to understand                                                                                                                                                                                                                                            | 37 (3)    | 32 (2)              |       |
| No, but I would have liked written information about the test(s)                                                                                                                                                                                                                   | 127 (9)   | 73 (5)              |       |
| I did not need written information                                                                                                                                                                                                                                                 | 250 (18)  | 219 (16)            |       |
| Don't know/ can't remember                                                                                                                                                                                                                                                         | 116 (9)   | 88 (6)              |       |
| <b>Q10. Who first told you that you had cancer?</b>                                                                                                                                                                                                                                |           |                     |       |
| A hospital doctor                                                                                                                                                                                                                                                                  | 1191 (80) | 1199 (80)           | 0.103 |
| A hospital nurse                                                                                                                                                                                                                                                                   | 44 (3)    | 91 (6)              |       |
| A GP                                                                                                                                                                                                                                                                               | 155 (10)  | 104 (7)             |       |
| Another health professional                                                                                                                                                                                                                                                        | 40 (3)    | 51 (3)              |       |
| A friend or relative                                                                                                                                                                                                                                                               | 5 (0.3)   | 3 (0.2)             |       |
| Nobody – I worked it out for myself                                                                                                                                                                                                                                                | 30 (2)    | 17 (1.1)            |       |
| Missing                                                                                                                                                                                                                                                                            | 31 (2)    | 31 (2)              |       |
| <b>Q13. Did you understand the explanation of what was wrong with you?</b>                                                                                                                                                                                                         |           |                     |       |
| Yes, I completely understood it                                                                                                                                                                                                                                                    | 1006 (67) | 1162 (78)           | 0.126 |
| Yes, I understood some of it                                                                                                                                                                                                                                                       | 438 (29)  | 313 (21)            |       |
| No, I did not understand it                                                                                                                                                                                                                                                        | 32 (2)    | 9 (1)               |       |
| Can't remember                                                                                                                                                                                                                                                                     | 8 (0.5)   | 6 (0.4)             |       |
| Missing                                                                                                                                                                                                                                                                            | 12 (1)    | 6 (0.4)             |       |
| <b>Q14. When you were told you had cancer, were you given written information about the type of cancer you had?</b>                                                                                                                                                                |           |                     |       |
| Yes, and it was easy to understand                                                                                                                                                                                                                                                 | 670 (45)  | 834 (56)            | 0.123 |
| Yes, but it was difficult to understand                                                                                                                                                                                                                                            | 104 (7)   | 91 (6)              |       |
| No, I was not given written information about the type of cancer I had                                                                                                                                                                                                             | 466 (31)  | 326 (22)            |       |
| I did not need written information                                                                                                                                                                                                                                                 | 153 (10)  | 158 (11)            |       |
| Don't know/ can't remember                                                                                                                                                                                                                                                         | 70 (5)    | 57 (4)              |       |
| Missing                                                                                                                                                                                                                                                                            | 33 (2)    | 30 (2)              |       |
| <b>Q32. During the last 12 months, have you had an operation (such as removal of a tumour or lump) at one of the hospitals in the covering letter?</b>                                                                                                                             |           |                     |       |
| Yes                                                                                                                                                                                                                                                                                | 824 (55)  | 1004 (67)           | 0.124 |
| No                                                                                                                                                                                                                                                                                 | 635 (42)  | 469 (31)            |       |
| Missing                                                                                                                                                                                                                                                                            | 37 (3)    | 23 (2)              |       |
| <b>Q66. Have you had treatment from any of the following (cancer specialists) for your cancer (patients were asked to tick as many as apply from the following list: physiotherapist; occupational therapist; dietician; speech and language therapist; lymphedema specialist)</b> |           |                     |       |
| Yes                                                                                                                                                                                                                                                                                | 132 (9)   | 37 (3)              | 0.138 |

Table 4: Comment categories with counts and ratios of positive and negative comments

| Comment Category                          | Negative comments (n=) | Positive comments (n=) | Negative to positive ratio (n : 1) | Overall ratio (+ve/ -ve) | CUP dataset coverage (%) |
|-------------------------------------------|------------------------|------------------------|------------------------------------|--------------------------|--------------------------|
| <b>1. Cross cutting themes</b>            |                        |                        |                                    |                          |                          |
| Inter-agency communication                | 351                    | 139                    | 2.38                               | -ve                      | 15.3                     |
| Patient Information                       | 89                     | 221                    | 0.40                               | +ve                      | 10.4                     |
| Waiting for appts./ investigations        | 88                     | 72                     | 1.24                               | -ve                      | 5.2                      |
| Waiting on the day                        | 299                    | 12                     | 24.9                               | -ve                      | 10.2                     |
| Investigations – receiving results        | 165                    | 37                     | 4.46                               | -ve                      | 6.32                     |
| <b>2. Health care professionals</b>       |                        |                        |                                    |                          |                          |
| GPs                                       | 220                    | 91                     | 2.41                               | -ve                      | 6.32                     |
| Consultants                               | 49                     | 98                     | 0.50                               | +ve                      | 4.8                      |
| Nursing                                   | 284                    | 409                    | 0.69                               | +ve                      | 22.7                     |
| Clinical nurse specialists                | 28                     | 72                     | 0.39                               | +ve                      | 3.3                      |
| <b>3. Treatment specialisms</b>           |                        |                        |                                    |                          |                          |
| Accident & Emergency                      | 28                     | 12                     | 2.33                               | -ve                      | 1.3                      |
| Chemotherapy                              | 58                     | 282                    | 0.21                               | +ve                      | 11.1                     |
| Radiotherapy                              | 32                     | 81                     | 0.39                               | +ve                      | 3.7                      |
| Surgery                                   | 170                    | 350                    | 0.49                               | +ve                      | 17.0                     |
| Palliative care                           | 2                      | 40                     | 0.05                               | +ve                      | 1.3                      |
| Post-treatment care                       | 38                     | 32                     | 1.19                               | -ve                      | 2.3                      |
| <b>4. Other quality of life concerns</b>  |                        |                        |                                    |                          |                          |
| Emotional, social and psychological needs | 39                     | 17                     | 2.29                               | -ve                      | 1.3                      |
| Financial concern                         | 75                     | 7                      | 10.71                              | -ve                      | 2.7                      |

1  
2  
3  
4  
5  
6  
7  
8  
9  
10  
11  
12  
13  
14  
15  
16  
17  
18  
19  
20  
21  
22  
23  
24  
25  
26  
27  
28  
29  
30  
31  
32  
33  
34  
35  
36  
37  
38  
39  
40  
41  
42  
43  
44  
45  
46  
47  
48  
49  
50  
51  
52  
53  
54  
55  
56  
57  
58  
59  
60

Figure 1: Percentage of CUP and non-CUP cases for each response category (Q76)

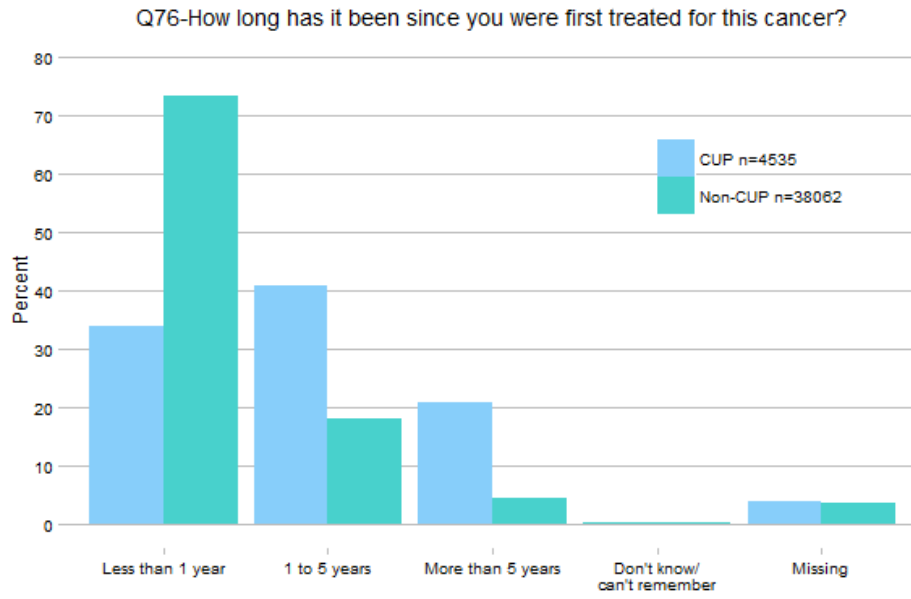

Peer review only

STROBE 2007 (v4) Statement—Checklist of items that should be included in reports of *cross-sectional studies*

| Section/Topic                | Item # | Recommendation                                                                                                                                                                       | Reported on page # |
|------------------------------|--------|--------------------------------------------------------------------------------------------------------------------------------------------------------------------------------------|--------------------|
| Title and abstract           | 1      | (a) Indicate the study's design with a commonly used term in the title or the abstract                                                                                               | p2                 |
|                              |        | (b) Provide in the abstract an informative and balanced summary of what was done and what was found                                                                                  | p2                 |
| <b>Introduction</b>          |        |                                                                                                                                                                                      |                    |
| Background/rationale         | 2      | Explain the scientific background and rationale for the investigation being reported                                                                                                 | p3                 |
| Objectives                   | 3      | State specific objectives, including any prespecified hypotheses                                                                                                                     | p3                 |
| <b>Methods</b>               |        |                                                                                                                                                                                      |                    |
| Study design                 | 4      | Present key elements of study design early in the paper                                                                                                                              | p4                 |
| Setting                      | 5      | Describe the setting, locations, and relevant dates, including periods of recruitment, exposure, follow-up, and data collection                                                      | p4                 |
| Participants                 | 6      | (a) Give the eligibility criteria, and the sources and methods of selection of participants                                                                                          | pp4 – 5            |
| Variables                    | 7      | Clearly define all outcomes, exposures, predictors, potential confounders, and effect modifiers. Give diagnostic criteria, if applicable                                             | pp4 - 5            |
| Data sources/<br>measurement | 8*     | For each variable of interest, give sources of data and details of methods of assessment (measurement). Describe comparability of assessment methods if there is more than one group | pp4-5              |
| Bias                         | 9      | Describe any efforts to address potential sources of bias                                                                                                                            | p4 - 5, Fig. 1     |
| Study size                   | 10     | Explain how the study size was arrived at                                                                                                                                            | pp4 - 5            |
| Quantitative variables       | 11     | Explain how quantitative variables were handled in the analyses. If applicable, describe which groupings were chosen and why                                                         | Pp4 - 5            |
| Statistical methods          | 12     | (a) Describe all statistical methods, including those used to control for confounding                                                                                                | p5                 |
|                              |        | (b) Describe any methods used to examine subgroups and interactions                                                                                                                  | N/A                |
|                              |        | (c) Explain how missing data were addressed                                                                                                                                          | N/A                |
|                              |        | (d) If applicable, describe analytical methods taking account of sampling strategy                                                                                                   | p5                 |
|                              |        | (e) Describe any sensitivity analyses                                                                                                                                                | N/A                |
| <b>Results</b>               |        |                                                                                                                                                                                      |                    |

|                          |     |                                                                                                                                                                                                              |                           |
|--------------------------|-----|--------------------------------------------------------------------------------------------------------------------------------------------------------------------------------------------------------------|---------------------------|
| Participants             | 13* | (a) Report numbers of individuals at each stage of study—eg numbers potentially eligible, examined for eligibility, confirmed eligible, included in the study, completing follow-up, and analysed            | p4 - 5                    |
|                          |     | (b) Give reasons for non-participation at each stage                                                                                                                                                         | N/A                       |
|                          |     | (c) Consider use of a flow diagram                                                                                                                                                                           | N/A                       |
| Descriptive data         | 14* | (a) Give characteristics of study participants (eg demographic, clinical, social) and information on exposures and potential confounders                                                                     | p6, Table 2               |
|                          |     | (b) Indicate number of participants with missing data for each variable of interest                                                                                                                          | N/A                       |
| Outcome data             | 15* | Report numbers of outcome events or summary measures                                                                                                                                                         | p6, 7 & 8, Tables 3 and 4 |
| Main results             | 16  | (a) Give unadjusted estimates and, if applicable, confounder-adjusted estimates and their precision (eg, 95% confidence interval). Make clear which confounders were adjusted for and why they were included | p6, Tables 3              |
|                          |     | (b) Report category boundaries when continuous variables were categorized                                                                                                                                    | N/A                       |
|                          |     | (c) If relevant, consider translating estimates of relative risk into absolute risk for a meaningful time period                                                                                             | N/A                       |
| Other analyses           | 17  | Report other analyses done—eg analyses of subgroups and interactions, and sensitivity analyses                                                                                                               | N/A                       |
| <b>Discussion</b>        |     |                                                                                                                                                                                                              |                           |
| Key results              | 18  | Summarise key results with reference to study objectives                                                                                                                                                     | p8 - 9                    |
| Limitations              | 19  | Discuss limitations of the study, taking into account sources of potential bias or imprecision. Discuss both direction and magnitude of any potential bias                                                   | p9                        |
| Interpretation           | 20  | Give a cautious overall interpretation of results considering objectives, limitations, multiplicity of analyses, results from similar studies, and other relevant evidence                                   | p8 - 10                   |
| Generalisability         | 21  | Discuss the generalisability (external validity) of the study results                                                                                                                                        | p9 – 10                   |
| <b>Other information</b> |     |                                                                                                                                                                                                              |                           |
| Funding                  | 22  | Give the source of funding and the role of the funders for the present study and, if applicable, for the original study on which the present article is based                                                | p10                       |

\*Give information separately for cases and controls in case-control studies and, if applicable, for exposed and unexposed groups in cohort and cross-sectional studies.

**Note:** An Explanation and Elaboration article discusses each checklist item and gives methodological background and published examples of transparent reporting. The STROBE checklist is best used in conjunction with this article (freely available on the Web sites of PLoS Medicine at <http://www.plosmedicine.org/>, Annals of Internal Medicine at <http://www.annals.org/>, and Epidemiology at <http://www.epidem.com/>). Information on the STROBE Initiative is available at [www.strobe-statement.org](http://www.strobe-statement.org).

# BMJ Open

## Differences in experiences of care between patients diagnosed with metastatic cancer of known and unknown primaries: mixed method findings from the 2013 Cancer Patient Experience Survey in England

|                                 |                                                                                                                                                                                                                                                                                                                                                                                                                                                                                                                                                                                                               |
|---------------------------------|---------------------------------------------------------------------------------------------------------------------------------------------------------------------------------------------------------------------------------------------------------------------------------------------------------------------------------------------------------------------------------------------------------------------------------------------------------------------------------------------------------------------------------------------------------------------------------------------------------------|
| Journal:                        | <i>BMJ Open</i>                                                                                                                                                                                                                                                                                                                                                                                                                                                                                                                                                                                               |
| Manuscript ID                   | bmjopen-2017-017881.R1                                                                                                                                                                                                                                                                                                                                                                                                                                                                                                                                                                                        |
| Article Type:                   | Research                                                                                                                                                                                                                                                                                                                                                                                                                                                                                                                                                                                                      |
| Date Submitted by the Author:   | 27-Jul-2017                                                                                                                                                                                                                                                                                                                                                                                                                                                                                                                                                                                                   |
| Complete List of Authors:       | Wagland, Richard; University of Southampton, Faculty of Health Sciences<br>Bracher, Michael ; Bournemouth University, Department of Health and Social Sciences<br>Drosdowsky, Allison ; Peter MacCallum Cancer Institute, Department of Cancer Experiences Research<br>Richardson, Alison; University of Southampton, Faculty of Health Sciences<br>Symons, John; Cancer of Unknown Primary CUP Foundation Jo's Friends, Director<br>Mileshkin, Linda; Peter MacCallum Cancer Institute, Division of Cancer Medicine<br>Schofield, Penelope ; The University of Melbourne; Swinburne University of Technology |
| <b>Primary Subject Heading</b>: | Oncology                                                                                                                                                                                                                                                                                                                                                                                                                                                                                                                                                                                                      |
| Secondary Subject Heading:      | Epidemiology, Health services research                                                                                                                                                                                                                                                                                                                                                                                                                                                                                                                                                                        |
| Keywords:                       | Cancer of unknown primary, Patient experience, Communication, Health services research                                                                                                                                                                                                                                                                                                                                                                                                                                                                                                                        |
|                                 |                                                                                                                                                                                                                                                                                                                                                                                                                                                                                                                                                                                                               |

SCHOLARONE™  
Manuscripts

1  
2  
3 **Differences in experiences of care between patients diagnosed with metastatic cancer of known**  
4 **and unknown primaries: mixed method findings from the 2013 Cancer Patient Experience Survey**  
5 **in England**  
6

7 **Authors:**

8  
9 **Dr Richard Wagland**, Senior Research Fellow, Faculty of Health Sciences, University of Southampton,  
10 UK  
11

12 **Dr Mike Bracher**, Research Fellow, Faculty of Health and Social Sciences, Dept. of Human Sciences  
13 and Public Health, Bournemouth University, UK.  
14

15 **Dr Allison Drosdowsky**, Researcher, Dept. of Cancer Experiences Research, Peter MacCallum Cancer  
16 Centre, Melbourne, Australia  
17

18 **Prof. Alison Richardson**, Professor of Cancer Nursing and End of Life Care & Director - Southampton  
19 Academy of Research, University of Southampton & University Hospital Southampton NHS  
20 Foundation Trust, UK.  
21

22 **Dr John Symons**, Director, Cancer of Unknown Primary Foundation, United Kingdom  
23

24 **Dr Linda Mileshkin**, Medical Oncologist, Division of Cancer Medicine, Peter MacCallum Cancer  
25 Centre, Melbourne, Australia  
26

27 **Prof. Penny Schofield**, Dept. of Psychology, Swinburne University of Technology, Melbourne,  
28 Australia  
29

30 **Acknowledgements:** We would like to thank Dr Karla Gough, Senior Research Fellow, Department of  
31 Cancer Experiences Research, Peter MacCallum Cancer Centre, who assisted with analysis.  
32

33 **Corresponding Author:**

34 Dr Richard Wagland, Senior Research Fellow, Faculty of Health Sciences, Building 67, Highfield,  
35 Southampton, SO17 1BJ.  
36 Tel: 023 8059 7868, Email: [R.Wagland@soton.ac.uk](mailto:R.Wagland@soton.ac.uk)  
37

38 **Word count:** Abstract: 299; Manuscript: 4486  
39

40 **Key words:** Cancer of unknown primary; oncology; patient experience; Health service research;  
41 communication  
42

43 **Data sharing agreement:** Source data for the study are closed question responses and free-text  
44 responses to the Cancer Patient Experience Survey in England for 2013. These data are available from the  
45 survey provider (Quality Health, UK) <https://www.quality-health.co.uk/>—email: [info@quality-](mailto:info@quality-health.co.uk)  
46 [health.co.uk](mailto:info@quality-health.co.uk).  
47

48 **Contributorship statement:** PS, RW and AR conceived the idea of the study and acquisition of the  
49 data. PS was responsible for the design of the quantitative study, RW for design of the qualitative  
50 study. AD was responsible for undertaking quantitative data analysis; MB and RW were responsible  
51 for undertaking analysis of qualitative data. PS, LM, AR, JS, AD, MB and RW were all involved with  
52 interpretation of the results from both studies. The initial draft of the paper was produced by RW  
53  
54  
55  
56  
57  
58  
59  
60

1  
2  
3 and MB, and circulated repeatedly between all authors for critical revision. All authors read and  
4 approved the final manuscript.  
5

6 **Objectives:** To explore differences in experiences of care reported in the Cancer Patient Experience  
7 Survey (CPES) between patients with Cancer of Unknown Primary (CUP) and those with metastatic  
8 disease of known primary (non-CUP); to determine insights pertaining to the experiences of care for  
9 CUP respondents from free-text comments.  
10

11 **Design:** Two separate, but related, studies, involving secondary analysis of existing data. Using  
12 frequency matching of CUP and non-CUP patients, statistical comparisons of responses to CPES  
13 questions were conducted. Free text comments from CUP respondents were analysed thematically.  
14  
15

16 **Setting and participants:** The CPES questionnaire comprises 63 closed questions measuring eight  
17 areas that relate to experience of care and three free-text questions. Questionnaires were mailed to  
18 all adult patients (aged  $\geq 16$  years) in England with cancer admitted to hospital between 01/09/13-  
19 30/11/13.  
20  
21

22 **Results:** Matched analysis of closed response items from 2992 patients found significant differences  
23 between CUP (n=1496) and non-CUP patients (n=1496): CUP patients were more likely to want more  
24 written information about their type of cancer and tests received, to receive their diagnosis from a  
25 GP and have seen allied health professionals, but less likely to have understood explanations of their  
26 condition or had surgery. Free-text responses (n=3055) were coded into seventeen categories, and  
27 provided deeper insight regarding patient information and interactions with GPs. CPES data may  
28 include a preponderance of patients with favourable CUP sub-types, and patients initially identified  
29 as CUP but whose primary was subsequently identified.  
30  
31  
32

33 **Conclusions:** These are the first large-scale studies to explore the experiences of care of CUP  
34 patients. The significant differences identified between the experiences of CUP and non-CUP  
35 patients suggest CUP patients require more psychosocial support and specific interventions to  
36 manage diagnostic uncertainty and the multiple investigations many CUP patients face. Substantial  
37 limitations were identified with the CPES data, emphasising the need for prospective studies.  
38  
39  
40  
41

#### 42 **Strengths and limitations of this study:**

- 44 • The first large-scale study quantifying experiences of CUP patients compared to  
45 those with known primary cancers;
- 46 • The first qualitative analysis of free-text comments drawn from a national sample of  
47 CUP patients;
- 48 • The profile of CUP patients who responded to the Cancer Patient Experience Survey  
49 (CPES) were found not to be representative of this patient population;
- 50 • Reasons for sample limitations include: time between patient identification and  
51 survey participation; inconsistent administration of ICD-10 codes; neglect of CUP  
52 typology;
- 53 • These limitations highlight the need for prospective, observational cohort studies to  
54 investigate the experiential, informational and psychosocial issues faced by CUP  
55 patients.  
56  
57  
58  
59  
60



## INTRODUCTION

Patients with cancer of unknown primary (CUP) have metastatic malignant disease, for which an identifiable primary site has not been identified after extensive clinical evaluation. CUP is not a single disease, but rather a heterogeneous collection of cancer types with a wide variety of clinical presentations, which are hypothesised to share a common tendency to metastasise early [1]. CUP was the 5<sup>th</sup> most common cancer in the UK in 2014, accounting for 3% of new cancers and 6% of cancer deaths [2]. World-wide it has been identified as between the 6<sup>th</sup> to 8<sup>th</sup> most common cancer, accounting for 2.3%-5% of all new cancer cases, and is the 3<sup>rd</sup> to 4<sup>th</sup> most common cause of death [3,4]. The UK National Institute of Clinical Excellence (NICE) published guidelines for the management of CUP patients in 2010 [5], which for the first time developed a taxonomy of definitions that reflected different phases of investigations for CUP: malignancy of undefined primary origin (MUO); provisional CUP (pCUP), and: confirmed CUP (Table 1). The guidelines also recommended the establishment of specialist CUP multi-disciplinary team (MDTs) in each National Health Service (NHS) cancer centre, to include an oncologist, palliative care physician and clinical nurse specialist (CNS) [5].

However, with the exception of three previous studies [6–8], there is very little published research on quality of life (QoL) and psychosocial aspects of CUP. Patients with CUP struggle with uncertainty and distress, especially regarding prognosis [6], possible recurrence, and the primary's hereditary potential [7]. Problems with care continuity commonly faced by cancer patients were amplified for those with CUP, particularly in relation to coordination, accountability and timeliness of care [7]. A recent cross-sectional study from Greece, using matched-sample analysis, found patients with CUP experienced higher depression and anxiety, and poorer QoL compared with those who have metastatic disease of either breast or colorectal cancer [8].

These findings suggest CUP patients may have unique psychosocial and supportive care needs, which require development of targeted supportive care interventions. Internationally, routine assessments of patient experiences of care are used increasingly to drive service quality improvements [9,10]. In the UK, the NHS Cancer Reform Strategy [11], Outcomes Strategy for Cancer [12] and recent Cancer Taskforce [13] documents highlight the important role of patient experiences in measuring and improving clinical quality. The national Cancer Patient Experience Survey (CPES) is an extensive, UK-wide programme of research about cancer patients' experiences of care whilst undergoing inpatient or day-case treatment [14]. The CPES has been administered annually since 2010, and is the biggest survey programme of its kind in the world. The data are a public resource and available from the survey provider, Quality Health. This represented an opportunity to interrogate these data to understand CUP patients' experiences of care to underpin the development of targeted care interventions for this population.

Drawing from the 2013 CPES, this paper reports findings from two related studies: qualitative and quantitative. The aim of both studies was to better understand the experiences of care amongst CUP patients. The quantitative study described perceived experiences of care of patients diagnosed with CUP compared to patients with metastatic cancer of a comparable known primary (non-CUP). The

second, qualitative study analysed free-text responses of CUP patients in the CPES, to identify emerging themes and insights regarding their experiences of cancer care.

## METHODS

### Survey design

The two studies reported here consist of secondary analyses of data collected as part of the English 2013 CPES, to assess differences in responses between CUP and non-CUP patients, and to explore free-text responses of patients with CUP.

The 2013 CPES was administered by the survey provider, Quality Health. The CPES questionnaire was mailed to all adult patients (aged  $\geq 16$  years) in England with a diagnosis of cancer, who had been admitted to an NHS hospital as an inpatient or day case patient over a three-month period (01/09/13-30/11/13). Non-responders were sent one reminder letter and a further reminder letter with questionnaire if necessary. The overall response rate for the 2013 CPES was 64% (n=68,737) [14].

### Survey instrument

The CPES instrument contained 63 closed question items, measuring eight key areas of patient experience across the care trajectory from diagnosis to leaving hospital: access to care; respect for patients' preferences; information and education; physical comfort; emotional support; involvement of family and friends; continuity and transition, and; coordination of care. Three free-text comment boxes at the end of the questionnaire asked the following questions: *Was there anything particularly good about your NHS care? Was there anything that could be improved? Any other comments?*

### Identification of respondents

All NHS hospitals treating adult patients with cancer in England were included. Patients were identified from data provided by these organisation, selected from local patient administration systems. Patients were identified as CUP using the tenth revision of the International Statistical Classification of Diseases and Related Problems (ICD-10) codes: C77 (Secondary and unspecified malignant neoplasm of lymph nodes), C78 (Secondary malignant neoplasm of respiratory and digestive organs), C79 (Secondary malignant neoplasm of other and unspecified sites), and C80 (Malignant neoplasm, without specification of site) [15].

## ANALYSIS

### Frequency matching analysis: Matching procedure

A frequency matching analysis was conducted to compare responses to the closed survey questions between CUP and non-CUP respondents. 4,535 CPES (2013) respondents were identified as CUP patients. The original plan was to match CUP and non-CUP samples for analysis on three variables: age group in deciles, sex and type of admission (ordinary admission, day case admission or regular day case admission). After exploration of the data, two further variables needed to be accounted for: tumour type and time since treatment start. Prevalence of breast and prostate cancer were high amongst non-CUP respondents to the CPES questionnaire, and it seemed inappropriate to match the CUP sample against a high proportion of such patients given estimates of likely site of origin in CUP

1  
2  
3 cases from autopsy and biomarker studies [16]. For this reason the dataset was restricted so these  
4 two tumour types represented only 5% each in the known primary sample. Preliminary analysis also  
5 found a marked difference between the CUP and non-CUP respondents regarding time since  
6 commencing cancer treatment (Fig 1). Patients with CUP were found disproportionately to have  
7 commenced treatment >1 year prior to the survey (34% of CUP Vs. 73% of non-CUP); many more  
8 than would normally be expected amongst a random CUP sample and suggests a high proportion of  
9 favourable CUP sub-types [4]. Due to the small proportion of non-CUP patients who responded that  
10 it had been longer than one year since they began treatment, it was impossible to match on this  
11 variable, so the sample was restricted to only those patients who responded 'less than one year'.  
12  
13

14  
15 The final sample included 1496 CUP patients who began treatment in the past year, with no missing  
16 data on the matching variables (age, sex and administration type). All patients were assigned IDs and  
17 CUP patients were matched with randomly selected non-CUP patients, who had no missing data on  
18 the matching variables, began treatment in the past year and were diagnosed with metastatic  
19 disease in specific tumour types (colorectal, breast, head and neck, kidney/adrenal, prostate,  
20 pancreas, and upper and lower gastrointestinal). These sites were selected as the primary sites from  
21 which CUP is most commonly thought to arise [16]. The final combined dataset contained 2,992  
22 respondents (Table 2).  
23  
24

#### 25 **Frequency matching analysis: Analysis**

26  
27 Chi-squared tests assessed associations between diagnosis type (CUP vs. non-CUP) and responses to  
28 each item. Given the very large sample, the likelihood of finding statistically significant associations  
29 at  $p < 0.05$  was high. It was therefore determined *a priori* that a 'small' or greater effect would be  
30 classified as meaningful, this corresponds to a Cramer's V of greater than 0.1 for comparisons where  
31 the degrees of freedom (df) = 1, 0.07, where df= 2, 0.06, where df=3, 0.05, and where df = 4 or 5.  
32 [17].  
33  
34  
35

#### 36 **Free-text analysis**

37  
38 Free-text responses provided by patients diagnosed with CUP were analysed to provide insights into  
39 their experiences of care. Comments were extracted from the CPES data set as individual text files  
40 and loaded into the NVivo qualitative data analysis software package. A coding framework for  
41 sorting free-text data from a previous study of responses to the Welsh CPES 2013 (WCPES) [18] was  
42 utilised. A sample of 200 randomly selected comments were double-coded by two researchers (MB,  
43 RW) to ensure compatibility of the framework. Coding agreement between the two researchers was  
44 80% (Cohen's Kappa). Any conflicts were resolved through discussion between coders. The  
45 framework was then used to categorise the free text comments. Search criteria were developed for  
46 each category, using terms gleaned from term-frequency and unique terms analyses of the coded  
47 data from the WCPES study. The search strategy was designed to identify relevant comments for  
48 each theme. During this process all comments were read and coded. Following categorisation of  
49 comments, a second level of thematic analysis was conducted on specific free-text categories to  
50 provide greater depth of insight [19].  
51  
52  
53  
54

#### 55 **Ethics and data management**

CPES data is a public resource and available from the survey provider, Quality Health. Data were anonymised and secondary analysis of closed questions permitted with agreement from NHS England. Because free-text data may contain personal identifiable data, approval from NHS England to analyse CPES free-text data was separately secured. Free-text analysis of CPES data was approved by the University of Southampton ethics committee on 12/11/14 (UoS Ethics ID:12313).

## FINDINGS

The demographic and clinical characteristics of respondents in both the matched analysis and free-text samples are shown in table 2. The mean age of samples were similar; 53.2 for the CUP free-text sample, 66.5 and 66.6 respectively for the matched CUP and non-CUP samples. Matched samples contained equal numbers of males (39%, n=583) and females (61%, n=913), proportions were broadly similar for the free-text sample (36.7% (n=1121) and 63.3% (n=1934) respectively). Finally, the ICD-10 codes of respondents indicated c78 (33%, n= 496) as the largest categorisation in the CUP matched sample and c79 (39.6%, n=1209) the largest in the free-text sample, while c80 was the smallest categorisation for both samples; 11%, (n=166) and 5.2% (n=160) respectively.

### Patient experiences: closed responses

Sixty comparisons were conducted. Of these, nine items showed differences between the CUP and non-CUP respondents that were classified as meaningfully different (table 3). In response to question 8 ('Beforehand, were you given written information about your [diagnostic] tests?'), CUP patients were more likely to respond 'No, but I would have liked written information about the test/s' or 'I did not need written information', and less likely to respond 'Yes, and it was easy to understand'. Similarly, Q9 'Were the results of your tests explained to you in a way you could understand?', CUP patients were less likely to respond 'Yes, completely'. In response to Q10 ('Who first told you that you had cancer?'), CUP participants were more likely to respond 'A GP', and less likely to respond 'A hospital nurse', with similar proportions indicating 'a hospital doctor'. In relation to Q13 ('Did you understand the explanation of what was wrong with you?'), CUP patients were less likely to answer 'Yes, I completely understood it' and more likely to respond 'Yes, I understood some of it' or 'No, I did not understand it'. For Q14 (When you were told you had cancer, were you given written information about the type of cancer you had?), CUP patients were less likely to respond 'Yes, and it was easy to understand', and more likely to respond 'No, I was not given written information about the type of cancer I had'. In response to Q16 'Do you think your views were taken into account when the team of doctors and nurses caring for you were discussing which treatment you should have?', CUP patients were less likely to answer 'Yes, definitely'. CUP patients were less likely to report having had surgery in the past 12 months (Q32), and in response to Q34 'Beforehand, were you given written information about your operation?', were less likely to respond 'Yes, and it was easy to understand' and more likely to respond 'No, I was not given written information about my operation'. Finally, CUP patients were more likely to report having received treatment from a lymphoedema specialist (Q66).

### Patient experiences: Free-text

3055 CUP patients provided comments to one or more of the three free-text questions. The mean length of comments was 64.2 words, with female respondents providing longer comments than male respondents (54.2 words and 69.9 words respectively). Comments were retrieved from the

dataset for seventeen categories (Table 4). Positive comments were predominant in eight categories ('communication with patients'; 'consultants'; 'Nursing'; 'Clinical Nurse Specialists'; 'chemotherapy'; 'radiotherapy'; 'surgery'; and 'palliative care'). Predominantly negative comments were provided by participants for the remaining nine categories ('inter-agency communication'; 'waiting for appointments/investigations'; 'waiting on the day'; 'receiving results of investigations'; 'GPs'; 'Accident & Emergency'; 'emotional, social and psychological needs'; 'financial concerns'; and post-treatment care'). Ratios of negative to positive comments varied widely between categories, with the greatest proportion of negative comments reported for 'waiting time on the day', while the greatest proportion of positive comments was for 'palliative care' (though numbers were small). A trend existed within all themes that positive comments tended to be of a more general quality and scope than negative comments. Essentially, if participants were reporting a negative experience they provided more detail.

Three of the six closed questions for which responses between CUP and non-CUP patients showed significant differences (Q10, Q13 and Q14) broadly mapped against particular free-text categories. Comments in these categories were subsequently thematically analysed in greater depth.

### **Patient information support from health professionals**

When investigated further, comments pertaining to staff-patient communication (n=310) provided insights on patient responses to the closed questions Qs 9, 13, 14 and 34; whether patients understood explanations given of their condition or their test results, and; whether they were provided with sufficient written information about their cancer or tests received. This free-text category had a net ratio of positive comments (0.4:1), but several themes were identified amongst negative comments (n=89) that indicated why patients found explanations of their condition difficult to understand and why they needed more information. For example, one CUP patient related her difficulty understanding why clinicians were unable to locate the primary tumour site, despite several investigations:

*I had 2 liver biopsies (the first one did not have sufficient to discern whether benign or malignant). I had a scan whilst in hospital, also a CT scan and an MRI scan. On my discharge, I later received an appointment for an endoscopy when 2 small nodules were discovered in the gullet, a biopsy was taken – they were benign, the tumour on the liver is a secondary and they still do not know where the primary is. (Female, 64 years).*

Patients were therefore sometimes uncertain or confused with regards the type of cancer they had and alluded to the frustration of not knowing and fears of progression:

*'Further detailed information of my cancer needed. Exactly where secondaries are and what kind of problems they could cause. Not knowing can be most distressing as you try to second guess things too much. (Female, 72 years).'*

*'They cannot find the primary source so it is rather upsetting as to how the disease is progressing.'* (Male, 69 years)

Some patients wished to receive more information about what to expect from the diagnosis, but moreover, wanted an opportunity to discuss what this meant for them:

1  
2  
3 *'I would have liked to have had information about how my type of cancer usually progresses,*  
4 *plus a care plan for my own case. I would have liked to have had a chat, as a matter of*  
5 *course, to someone about the practical side of having cancer.'* (Male, 71 years)  
6

7 Nevertheless, despite receiving explanations of their conditions from health professionals, patients  
8 sometimes reported difficulties with understanding the terminology used:  
9

10  
11 *'The surgeon I see cannot explain things without using clinical terms I do not understand. He*  
12 *could if he tried! And so often I do not understand the detail. In addition he is relatively*  
13 *emotionless.'* (Female, 57 years)  
14

15 In addition, patients sometimes reported receiving conflicting information from the many doctors  
16 involved in their care:  
17

18  
19 *'Sometimes difficult to get answers as too many doctors and nurses dealing with me and not*  
20 *passing on the relevant information and then having to explain it all over again. (This*  
21 *happened many times.)'* (Male, 68 years)  
22

23 Several clinicians could be involved with a CUP patient's care, leading to conflicting information, as  
24 they were sometimes passed between clinical teams, as this comment suggests:  
25

26  
27 *The only thing that could be improved was because it was a process of elimination I went*  
28 *from chest specialist, to organ oncologist and after my scans and biopsies finally back to my*  
29 *breast oncologist of 11 years ago. So my treatment didn't start until end of March – 6*  
30 *months later.* (Female, 62 years).  
31

### 32 **General Practitioners' diagnosis of CUP**

33

34 Analysis of closed items indicated CUP patients were more likely than non-CUP patients to be given  
35 their diagnosis by a GP. Analysis of comments regarding interactions with GPs (n=311) provided by  
36 participants found. CUP patients were more likely to report negative rather than positive  
37 experiences with GPs (ratio of 2.4:1). The theme containing most comments concerning GPs related  
38 to *speed of diagnosis/referral for further investigations*. Negative comments often indicated months  
39 and sometimes years of consulting GP services with cancer symptoms before diagnosis and/or  
40 specialist referral was made:  
41  
42

43  
44 *I wish my original GP had listened properly over the months I complained about weight loss*  
45 *(over 2 stone). Instead I had to change my GP who fast tracked me into hospital where a scan*  
46 *showed metastasized tumours.* (Female, 81 years)  
47

48 Comments often related delayed referrals as a consequence of GPs attributing symptoms to  
49 conditions other than cancer or giving insufficient regard to previous cancer diagnoses. Some  
50 comments described 'misdiagnosis' of symptoms were later found to be inaccurate.  
51

52  
53 *Very upset that I have to call the GP, a couple of times a week for 5 weeks, my pain getting*  
54 *worse by the day. My wife asked on a couple of visits if I could have x-ray, blood tests, GP*  
55 *said nothing wrong with me, it was just back ache. In the end my wife took me to A&E. She*  
56 *had to get me into wheelchair from the car. I was in terrible pain.* (Male, 79 years)  
57  
58  
59  
60

Poor communication between GP and secondary care services was also a prevalent topic within the 'GP' category, and revealed a lack of continuity between GP and secondary care. It is important to note that these comments were often not critical of GP services, but of the information provided to them by secondary services.

*I should like my GP to be kept informed more quickly of my treatment at hospital. At the moment, information does not get to her quickly enough, so if I want to discuss something with her, she does not have up to date information, sometimes 3-4 weeks behind. (Female, 65 years)*

## DISCUSSION

To our knowledge, these two investigations represent the first, large-scale studies quantifying the experiences of people with CUP compared to people with metastatic known primary cancers; and the first qualitative analysis of free-text comments from participants drawn from a national sample of CUP patients. Experiences of patients with CUP were broadly similar to those with advanced metastatic cancer, with the exception of the nine areas reported. This might suggest the success of recommendations advocated by NICE in the UK that relate to the introduction of MDTs and specialist nurses dedicated to patients with CUP [5], and that equivalent standards of care now exist irrespective of whether the primary site was known or unknown. However, it is not yet clear how consistently CUP MDTs have been established across the UK, and it is doubtful they were well established by 2013.

Patients in the CUP sample were significantly more likely to answer they would have liked more information than the non-CUP sample about the type of cancer they had and the investigations they underwent, and significantly less likely to understand the explanations of what was wrong with them. Providing accurate and helpful information and preparing CUP patients for their treatment trajectory is especially difficult given the uncertainty that pervades this diagnosis. The location of the primary tumour is the main reference point for treatment decisions and prognostic information [20], treatment regimens may change several times during a patient's illness trajectory and patients often receive conflicting information from clinicians [7]. Doctors face challenges when communicating with CUP patients in the face of such uncertainty [20,21], and consequently doctors often experience discomfort [22]. CUP patients also frequently undergo a greater number of investigations than patients with a known primary, as clinicians sometimes inappropriately 'chase the primary' [23]. Many doctors prefer to estimate a primary site on the basis of clinical signs but there is little consistency in the language used to describe the diagnosis to patients [21]. The number and diversity of health professionals involved with their care is often greater for CUP than non-CUP patients as they are often reviewed and moved between multiple multidisciplinary clinical teams [7]. This can result in confusion and anxiety for patients [6,7], and may partly explain why CUP patients reportedly felt their views were less often taken into account during treatment decision making.

CUP patients were significantly more likely to be first told they had cancer by their GP, compared to the non-CUP sample. It may be that, as CUP patients are often not adopted by a specific MDT, or are 'bounced' between MDTs [7,24], GPs may take responsibility for relaying the diagnosis to the patient on the basis of accumulating evidence, possibly prior to referring them to specialist consultation. Nevertheless, free-text responses also found CUP patients were more likely to report negative rather than positive experiences of interactions with GPs (ratio of 2.4:1), which often related to referrals

1  
2  
3 being delayed as a consequence of GPs attributing symptoms to conditions other than cancer or not  
4 sufficiently investigating patients' health concerns. That referral systems for MUO from primary to  
5 secondary care is variable across the UK may also contribute to such delays. CUP patients were  
6 significantly less likely to have surgery; by definition patients with CUP are diagnosed after a primary  
7 has metastasised and hence surgery is not usually an option. In contrast, those patients with an  
8 advanced known primary may well have had surgery prior to the discovery of metastases. Finally,  
9 the finding that patients with CUP are more likely to have seen a lymphedema specialist is difficult to  
10 explain and may be an artifact of the limitations of the sample as discussed below.  
11  
12

13  
14 A major limitation of this study is that the CUP sample is not representative of the profile of patients  
15 with CUP. During 2006-2010, the one-year relative survival for CUP patients in the UK was 16% [25],  
16 yet in this sample 62% of respondents with CUP had begun treatment for their cancer more than  
17 one year previous to their diagnosis. Potentially, many of the patients in the CUP sample may have a  
18 favourable sub-type of CUP: those with likely primary sites that have greater survival rates and  
19 reliable treatments [4], who may be still receiving follow up care at hospital in the years that  
20 followed their original diagnosis. We attempted to control for this potential bias by restricting the  
21 CUP sample to those who were first treated for their cancer less than one year previously.  
22 Nevertheless, these people were still well enough to complete the CPES several months post-  
23 discharge. Speculatively, the CUP sample in this analysis may be more like patients with advanced  
24 known cancer than a CUP sample recruited prospectively after diagnosis of confirmed CUP, which  
25 would have included many more individuals with poorer prognoses. Indeed, while almost half (49%)  
26 of patients diagnosed with CUP in 2009 were coded to the ICD-10 code c80, which also accounted  
27 for 93% of deaths from CUP in 2010 [26], a much smaller proportion of patients coded c80 were  
28 included in the CPES CUP population sample. Therefore, a prospectively recruited sample of CUP  
29 patients might have less positive experiences than the CUP sample in this analysis. Moreover, as we  
30 selected patients with a known primary for the non-CUP sample to approximate proportions of likely  
31 site of origin in CUP cases from autopsy and biomarker studies [16]; we have enriched the non-CUP  
32 sample with patients who have poorer prognoses, such as those with pancreatic and lung cancers.  
33 These patients may have less positive experiences than a more omnibus sample of patients with  
34 advanced known primaries.  
35  
36  
37  
38  
39

40  
41 Compounding these issues, the diagnoses used in this study were not self-reported or clinician-  
42 reported, but based on administrative data. The ICD-10 classification system does not differentiate  
43 between MUO, pCUP and cCUP [5]. For CPES, the ICD code was extracted directly from each Trust's  
44 administrative data records, and two errors may subsequently occur with this method. First, as ICD  
45 codes are generated by MDT administrators and not by doctors, there may be errors in coding. The  
46 second, more serious, issue is that because no distinction is made in the data capture between MUO,  
47 pCUP and cCUP, it is possible that if a primary site is later confirmed the coding will not be updated  
48 in the administrative file. As the survey maybe completed by patients some months post-diagnosis,  
49 some patients within our CUP sample may have already received a site-specific diagnosis, and the  
50 sample is therefore not fully representative of the profile of patients with MUO/CUP. Errors in  
51 classifying CUP are likely to be more pronounced for the CUP sample due to the uncertainty of  
52 whether or when a primary might be found, and because patients with MUO can pass among several  
53 multidisciplinary teams managing different cancer types [7]. Finally, using administrative data to  
54 define the CUP sample also fails to account for the patient's perception of their disease. Indeed, the  
55 limited research that exists indicates that patients are often very confused about a diagnosis of CUP  
56  
57  
58  
59  
60



1  
2  
3 and for many patients clinicians convey a 'best guess' primary site to direct treatment or access  
4 subsidised medical therapy [21]. What and how they are told of their diagnosis may influence their  
5 questionnaire responses.  
6

## 7 **CONCLUSION**

8  
9 These findings, when combined, suggest CUP patients may experience delays in diagnosis and to  
10 specialist referral, and greater uncertainty with regards understanding their diagnosis and be less  
11 prepared for what to expect regarding diagnostic investigations than patients with a known primary  
12 site. These represent specific areas where targeted psycho-educational interventions might be  
13 developed. But, given we identified significant limitations with the CPES CUP sample data, possibly  
14 as a consequence of inconsistent or erroneous coding and neglect of the NICE taxonomy of CUP, it  
15 is crucial to conduct prospective, observational cohort studies to develop a more complete  
16 understanding of the issues faced by CUP patients.  
17  
18  
19  
20  
21  
22  
23

24 **Competing interests:** No conflicts of interest.

25  
26 **Funding statement:** This work was supported by the Cancer of Unknown Primary (CUP) Foundation  
27 and Cancer Australia. Additional funding was provided by the 'Adventures in Research' funding  
28 stream at the University of Southampton.  
29  
30  
31  
32  
33  
34  
35  
36  
37  
38  
39  
40  
41  
42  
43  
44  
45  
46  
47  
48  
49  
50  
51  
52  
53  
54  
55  
56  
57  
58  
59  
60

## REFERENCES

- 1 Greco F, Hainsworth J. Cancer of Unknown Primary Site Cancer. In: DeVita Jr. VT, Lawrence TS, Rosenberg SA, eds. *Cancer: Principles & Practice of Oncology*. Wolters Kluwer, USA 2014.
- 2 Cancer Research UK. Cancer of unknown primary incidence statistics (trends over time). 2017. <http://www.cancerresearchuk.org/health-professional/cancer-statistics/statistics-by-cancer-type/cancer-of-unknown-primary/incidence#heading=Two> (accessed 16 May 2017).
- 3 Brewster DH, Lang J, Bhatti LA, *et al*. Descriptive epidemiology of cancer of unknown primary site in Scotland, 1961-2010. *Cancer Epidemiol* 2014;**38**:227–34. doi:10.1016/j.canep.2014.03.010
- 4 Pavlidis N, Pentheroudakis G. Cancer of unknown primary site. *Lancet (London, England)* 2012;**379**:1428–35. doi:10.1016/S0140-6736(11)61178-1
- 5 National Institute for Health and Care Excellence. Metastatic Malignant Disease of Unknown Primary Origin in Adults: Diagnosis and Management. Published Online First: 2010. <https://www.nice.org.uk/guidance/cg104/chapter/1-Guidance>
- 6 Boyland L, Davis C. Patients' experiences of carcinoma of unknown primary site: dealing with uncertainty. *Palliat Med* 2008;**22**:177–83. doi:10.1177/0269216307085341
- 7 Richardson A, Wagland R, Foster R, *et al*. Uncertainty and anxiety in the cancer of unknown primary patient journey: a multiperspective qualitative study. *BMJ Support Palliat Care* 2015;**5**:366–72. doi:10.1136/bmjspcare-2013-000482
- 8 Hyphantis T, Papadimitriou I, Petrakis D, *et al*. Psychiatric manifestations, personality traits and health-related quality of life in cancer of unknown primary site. *Psychooncology* 2013;**22**:2009–15. doi:10.1002/pon.3244
- 9 Black N. *Patient reported outcome measures could help transform healthcare*. 2013. doi:10.1136/bmj.f167
- 10 Lipscomb J, Gotay CC, Snyder CF. Patient-reported Outcomes in Cancer: A Review of Recent Research and Policy Initiatives. *CA Cancer J Clin* 2007;**57**:278–300. doi:10.3322/CA.57.5.278
- 11 DoH. Cancer Reform Strategy. London, UK: : Department of Health 2007. [webarchive.nationalarchives.gov.uk/+/www.dh.../Cancer/DH\\_091120](http://webarchive.nationalarchives.gov.uk/+/www.dh.../Cancer/DH_091120)
- 12 Department of Health. Improving Outcomes : A Strategy for Cancer. Department of Health 2011. [www.dh.gov.uk/publications](http://www.dh.gov.uk/publications)
- 13 The Independent Cancer Taskforce. Achieving World-Class Cancer Outcomes. 2015;:92.
- 14 Quality Health. National Cancer Patient Experience Survey. 2014.
- 15 WHO. WHO | International Classification of Diseases. *WHO* Published Online First: 2017. <http://www.who.int/classifications/icd/en/> (accessed 16 May 2017).
- 16 Pentheroudakis G, Golfinopoulos V, Pavlidis N. Switching benchmarks in cancer of unknown primary: From autopsy to microarray. *Eur J Cancer* 2007;**43**:2026–36.

- 1  
2  
3 doi:10.1016/j.ejca.2007.06.023  
4  
5 17 Cohen J. A power primer. *Psychol Bull* 1992;**112**:155–9. doi:10.1037/0033-2909.112.1.155  
6  
7 18 Bracher M, Corner DJ, Wagland R. Exploring experiences of cancer care in Wales: a thematic  
8 analysis of free-text responses to the 2013 Wales Cancer Patient Experience Survey (WCPES).  
9 *BMJ Open* 2016;**6**:e011830. doi:10.1136/bmjopen-2016-011830  
10  
11 19 Mason J. *Qualitative researching*. SAGE Publications 2002.  
12  
13 20 Ryan RC, Lawlor PG, Walshe JM. Cancer of unknown primary: addressing the communicative,  
14 ethical and medical challenges in clinical practice – a perspective from palliative care and  
15 supportive oncology. *Prog Palliat Care* 2010;**18**:291–6.  
16 doi:10.1179/096992610X12775428636782  
17  
18 21 Karapetis CS, Guccione L, Tattersall MHN, *et al*. Perceptions of cancer of unknown primary  
19 site: a national survey of Australian medical oncologists. *Intern Med J* 2017;**47**:408–14.  
20 doi:10.1111/imj.13373  
21  
22 22 Symons J, James N, Brooks D. Dilemmas in managing patients with cancer of unknown  
23 primary. *Cancer Nurs Pract* 2009;**8**:27–32. doi:10.7748/cnp2009.10.8.8.27.c7307  
24  
25 23 James N, Symons J. Chasing the primary. *Cancer Nurs Pract* 2010;**9**:10–10.  
26 doi:10.7748/cnp.9.7.10.s13  
27  
28 24 Wagland R, Bracher M, Ibanez Esqueda A, *et al*. Experiences of Care of Patients with Cancer  
29 of Unknown Primary ( CUP ): Analysis of the 2010 , 2011-12 & 2013 Cancer Patient Experience  
30 Survey ( CPES ) England : Final Report. Southampton, UK: 2015.  
31  
32 25 NCRAS (National Cancer Registration and Analysis Service). Routes to Diagnosis: Cancer of  
33 Unknown Primary.  
34 [http://ncin.org.uk/publications/data\\_briefings/routes\\_to\\_diagnosis\\_cancer\\_of\\_unknown\\_pri](http://ncin.org.uk/publications/data_briefings/routes_to_diagnosis_cancer_of_unknown_primary)  
35 [mary](http://ncin.org.uk/publications/data_briefings/routes_to_diagnosis_cancer_of_unknown_primary) (accessed 16 May2017).  
36  
37 26 NCRAS (National Cancer Registration and Analysis Service). Cancer of Unknown Primary:  
38 What is Cancer of Unknown Primary?  
39 [http://www.ncin.org.uk/publications/data\\_briefings/cancer\\_of\\_unknown\\_primary](http://www.ncin.org.uk/publications/data_briefings/cancer_of_unknown_primary)  
40  
41  
42  
43  
44  
45  
46  
47  
48  
49  
50  
51  
52  
53  
54  
55  
56  
57  
58  
59  
60

**Table 1 Terms used in NICE guideline to define CUP**

|                                                                   |                                                                                                                                                                                                                                                                       |
|-------------------------------------------------------------------|-----------------------------------------------------------------------------------------------------------------------------------------------------------------------------------------------------------------------------------------------------------------------|
| Malignancy of undefined primary origin (MUO)                      | Metastatic malignancy identified on the basis of a limited number of tests, without an obvious primary site, before comprehensive investigation                                                                                                                       |
| Provisional carcinoma of unknown primary origin (provisional CUP) | Metastatic epithelial or neuro-endocrine malignancy identified on the basis of the histology or cytology, with no primary site detected despite a selected initial screen of investigations, before specialist review and possible further specialised investigations |
| Confirmed carcinoma of unknown primary origin (confirmed CUP)     | Metastatic epithelial or neuro-endocrine malignancy identified on the basis of final histology, with no primary site detected despite a selected initial screen of investigations, specialist review, and further specialised investigations as appropriate           |

Table 2: Demographic and clinical characteristics of the sample are shown in Table 2.

| Observation        | Free-text sample<br>(n=3055) |      | Matched-pair samples (2992) |      |                  |      |
|--------------------|------------------------------|------|-----------------------------|------|------------------|------|
|                    |                              |      | CUP (n=1496)                |      | Non CUP (n=1496) |      |
| Age                |                              |      |                             |      |                  |      |
| Mean (SD)          | 65.3 (11.3)                  |      | 66.5 (11.7)                 |      | 66.6 (11.5)      |      |
| Median (IQR)       | 66 (58, 73)                  |      | 67 (59, 75)                 |      | 67 (59, 75)      |      |
| Range              | 16, 95                       |      | 20, 98                      |      | 23, 94           |      |
| Sex                |                              |      |                             |      |                  |      |
|                    | n                            | %    | n                           | %    | n                | %    |
| Male               | 1121                         | 36.7 | 583                         | 39.0 | 583              | 39.0 |
| Female             | 1934                         | 63.3 | 913                         | 61.0 | 913              | 61.0 |
| Diagnosis          |                              |      |                             |      |                  |      |
| CUP                | 3055                         | 100  | 1496                        | 100  | --               |      |
| Breast             |                              |      | --                          |      | 111              | 7.4  |
| Head and neck      |                              |      | --                          |      | 185              | 12.4 |
| Lung               |                              |      | --                          |      | 271              | 18.1 |
| Pancreatic         |                              |      | --                          |      | 44               | 2.9  |
| Prostate           |                              |      | --                          |      | 52               | 3.5  |
| Renal              |                              |      | --                          |      | 89               | 5.9  |
| Upper and lower GI |                              |      | --                          |      | 744              | 49.7 |
| ICD-10 codes       |                              |      |                             |      |                  |      |
| c77                | 514                          | 16.8 | 399                         | 27   | -                | -    |
| c78                | 1172                         | 38.4 | 496                         | 33   | -                | -    |
| c79                | 1209                         | 39.6 | 435                         | 29   | -                | -    |
| c80                | 160                          | 5.2  | 166                         | 11   | -                | -    |

Table 3: Matched paired analysis: CUP and non-CUP patients

| Item                                                                                                                                                            | CUP<br>n (%) | Known primary<br>n (%) | Cramer's V |
|-----------------------------------------------------------------------------------------------------------------------------------------------------------------|--------------|------------------------|------------|
| <b>Q8. Beforehand, were you given written information about your test(s)?</b>                                                                                   |              |                        |            |
| Yes, and it was easy to understand                                                                                                                              | 808 (83)     | 917 (90)               | 0.102      |
| Yes, but it was difficult to understand                                                                                                                         | 37 (4)       | 32 (3)                 |            |
| No, but I would have liked written information about the test(s)                                                                                                | 127 (13)     | 73 (7)                 |            |
| <i>I did not need written information/Don't know/can't remember</i>                                                                                             | 392          | 334                    |            |
| <b>Q9. Were the results of the test(s) explained to you in a way you could understand?</b>                                                                      |              |                        |            |
| Yes, completely                                                                                                                                                 | 961 (72)     | 1042 (78)              | 0.076      |
| Yes, to some extent                                                                                                                                             | 322 (24)     | 259 (20)               |            |
| No, but I would have liked an explanation                                                                                                                       | 48 (4)       | 28 (2)                 |            |
| <i>I did not need an explanation / Don't know / can't remember / Missing</i>                                                                                    | 33           | 27                     |            |
| <b>Q10. Who first told you that you had cancer?</b>                                                                                                             |              |                        |            |
| A hospital doctor                                                                                                                                               | 1191 (81)    | 1199 (82)              | 0.104      |
| A hospital nurse                                                                                                                                                | 44 (3)       | 91 (6)                 |            |
| A GP                                                                                                                                                            | 155 (11)     | 104 (7)                |            |
| Another health professional                                                                                                                                     | 40 (3)       | 51 (4)                 |            |
| A friend or relative                                                                                                                                            | 5 (0.3)      | 3 (0.2)                |            |
| Nobody – I worked it out for myself                                                                                                                             | 30 (2)       | 17 (1)                 |            |
| <i>Missing</i>                                                                                                                                                  | 31           | 31                     |            |
| <b>Q13. Did you understand the explanation of what was wrong with you?</b>                                                                                      |              |                        |            |
| Yes, I completely understood it                                                                                                                                 | 1006 (68)    | 1162 (78)              | 0.123      |
| Yes, I understood some of it                                                                                                                                    | 438 (30)     | 313 (21)               |            |
| No, I did not understand it                                                                                                                                     | 32 (2)       | 9 (1)                  |            |
| <i>Can't remember / Missing</i>                                                                                                                                 | 20           | 12                     |            |
| <b>Q14. When you were told you had cancer, were you given written information about the type of cancer you had?</b>                                             |              |                        |            |
| Yes, and it was easy to understand                                                                                                                              | 670 (54)     | 834 (67)               | 0.132      |
| Yes, but it was difficult to understand                                                                                                                         | 104 (8)      | 91 (7)                 |            |
| No, I was not given written information about the type of cancer I had                                                                                          | 466 (38)     | 326 (26)               |            |
| <i>I did not need written information / Don't know / can't remember / Missing</i>                                                                               | 256          | 245                    |            |
| <b>Q16. Do you think your views were taken into account when the team of doctors and nurses caring for you were discussing which treatment you should have?</b> |              |                        |            |
| Yes, definitely                                                                                                                                                 | 848 (61)     | 951 (68)               | 0.078      |
| Yes, to some extent                                                                                                                                             | 343 (25)     | 284 (20)               |            |
| No, my views were not taken into account                                                                                                                        | 112 (8)      | 82 (6)                 |            |
| I didn't know my treatment was being discussed by a team of doctors/ nurses                                                                                     | 91 (7)       | 80 (6)                 |            |

|                                                                                                                                                                                                                                                                                    |          |           |       |
|------------------------------------------------------------------------------------------------------------------------------------------------------------------------------------------------------------------------------------------------------------------------------------|----------|-----------|-------|
| <i>Not sure / can't remember / Missing</i>                                                                                                                                                                                                                                         | 102      | 99        |       |
| <b>Q32. During the last 12 months, have you had an operation (such as removal of a tumour or lump) at one of the hospitals in the covering letter?</b>                                                                                                                             |          |           |       |
| Yes                                                                                                                                                                                                                                                                                | 824 (55) | 1004 (67) | 0.124 |
| No                                                                                                                                                                                                                                                                                 | 635 (42) | 469 (31)  |       |
| <i>Missing</i>                                                                                                                                                                                                                                                                     | 37       | 23        |       |
| <b>Q34. Beforehand, were you given written information about your operation?</b>                                                                                                                                                                                                   |          |           |       |
| Yes, and it was easy to understand                                                                                                                                                                                                                                                 | 472 (64) | 649 (71)  | 0.077 |
| Yes, but it was difficult to understand                                                                                                                                                                                                                                            | 36 (5)   | 30 (3)    |       |
| No, I was not given written information about my operation                                                                                                                                                                                                                         | 229 (31) | 234 (26)  |       |
| <i>Don't know / can't remember / Missing</i>                                                                                                                                                                                                                                       | 87       | 91        |       |
| <b>Q66. Have you had treatment from any of the following (cancer specialists) for your cancer (patients were asked to tick as many as apply from the following list: physiotherapist; occupational therapist; dietician; speech and language therapist; lymphedema specialist)</b> |          |           |       |
| Yes                                                                                                                                                                                                                                                                                | 132 (9)  | 37 (3)    | 0.138 |

Table 4: Comment categories with counts and ratios of positive and negative comments

| Comment Category                          | Negative comments (n=) | Positive comments (n=) | Negative to positive ratio (n : 1) | Overall ratio (+ve/ -ve) | CUP dataset coverage (%) |
|-------------------------------------------|------------------------|------------------------|------------------------------------|--------------------------|--------------------------|
| <b>1. Cross cutting themes</b>            |                        |                        |                                    |                          |                          |
| Inter-agency communication                | 351                    | 139                    | 2.38                               | -ve                      | 15.3                     |
| Patient Information                       | 89                     | 221                    | 0.40                               | +ve                      | 10.4                     |
| Waiting for appts./ investigations        | 88                     | 72                     | 1.24                               | -ve                      | 5.2                      |
| Waiting on the day                        | 299                    | 12                     | 24.9                               | -ve                      | 10.2                     |
| Investigations – receiving results        | 165                    | 37                     | 4.46                               | -ve                      | 6.32                     |
| <b>2. Health care professionals</b>       |                        |                        |                                    |                          |                          |
| GPs                                       | 220                    | 91                     | 2.41                               | -ve                      | 6.32                     |
| Consultants                               | 49                     | 98                     | 0.50                               | +ve                      | 4.8                      |
| Nursing                                   | 284                    | 409                    | 0.69                               | +ve                      | 22.7                     |
| Clinical nurse specialists                | 28                     | 72                     | 0.39                               | +ve                      | 3.3                      |
| <b>3. Treatment specialisms</b>           |                        |                        |                                    |                          |                          |
| Accident & Emergency                      | 28                     | 12                     | 2.33                               | -ve                      | 1.3                      |
| Chemotherapy                              | 58                     | 282                    | 0.21                               | +ve                      | 11.1                     |
| Radiotherapy                              | 32                     | 81                     | 0.39                               | +ve                      | 3.7                      |
| Surgery                                   | 170                    | 350                    | 0.49                               | +ve                      | 17.0                     |
| Palliative care                           | 2                      | 40                     | 0.05                               | +ve                      | 1.3                      |
| Post-treatment care                       | 38                     | 32                     | 1.19                               | -ve                      | 2.3                      |
| <b>4. Other quality of life concerns</b>  |                        |                        |                                    |                          |                          |
| Emotional, social and psychological needs | 39                     | 17                     | 2.29                               | -ve                      | 1.3                      |
| Financial concern                         | 75                     | 7                      | 10.71                              | -ve                      | 2.7                      |



1  
2  
3  
4  
5  
6  
7  
8  
9  
10  
11  
12  
13  
14  
15  
16  
17  
18  
19  
20  
21  
22  
23  
24  
25  
26  
27  
28  
29  
30  
31  
32  
33  
34  
35  
36  
37  
38  
39  
40  
41  
42  
43  
44  
45  
46  
47  
48  
49  
50  
51  
52  
53  
54  
55  
56  
57  
58  
59  
60

Figure 1: Percentage of CUP and non-CUP cases for each response category (Q76)

For peer review only

1  
2  
3  
4  
5  
6  
7  
8  
9  
10  
11  
12  
13  
14  
15  
16  
17  
18  
19  
20  
21  
22  
23  
24  
25  
26  
27  
28  
29  
30  
31  
32  
33  
34  
35  
36  
37  
38  
39  
40  
41  
42  
43  
44  
45  
46  
47  
48  
49  
50  
51  
52  
53  
54  
55  
56  
57  
58  
59  
60

Figure 1: Percentage of CUP and non-CUP cases for each response category (Q76)

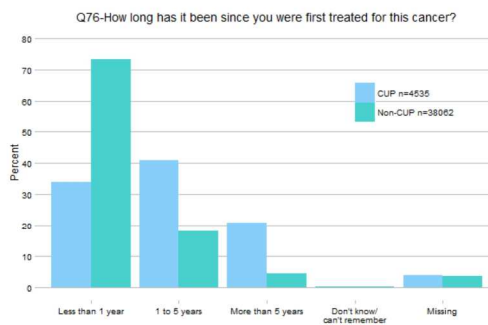

1

Figure 1: Percentage of CUP and non-CUP cases for each response category (Q76)

210x297mm (300 x 300 DPI)

STROBE 2007 (v4) Statement—Checklist of items that should be included in reports of *cross-sectional studies*

| Section/Topic             | Item # | Recommendation                                                                                                                                                                       | Reported on page # |
|---------------------------|--------|--------------------------------------------------------------------------------------------------------------------------------------------------------------------------------------|--------------------|
| Title and abstract        | 1      | (a) Indicate the study’s design with a commonly used term in the title or the abstract                                                                                               | p2                 |
|                           |        | (b) Provide in the abstract an informative and balanced summary of what was done and what was found                                                                                  | p2                 |
| <b>Introduction</b>       |        |                                                                                                                                                                                      |                    |
| Background/rationale      | 2      | Explain the scientific background and rationale for the investigation being reported                                                                                                 | p3                 |
| Objectives                | 3      | State specific objectives, including any prespecified hypotheses                                                                                                                     | p3                 |
| <b>Methods</b>            |        |                                                                                                                                                                                      |                    |
| Study design              | 4      | Present key elements of study design early in the paper                                                                                                                              | p4                 |
| Setting                   | 5      | Describe the setting, locations, and relevant dates, including periods of recruitment, exposure, follow-up, and data collection                                                      | p4                 |
| Participants              | 6      | (a) Give the eligibility criteria, and the sources and methods of selection of participants                                                                                          | pp4 – 5            |
| Variables                 | 7      | Clearly define all outcomes, exposures, predictors, potential confounders, and effect modifiers. Give diagnostic criteria, if applicable                                             | pp4 - 5            |
| Data sources/ measurement | 8*     | For each variable of interest, give sources of data and details of methods of assessment (measurement). Describe comparability of assessment methods if there is more than one group | pp4-5              |
| Bias                      | 9      | Describe any efforts to address potential sources of bias                                                                                                                            | p4 - 5, Fig. 1     |
| Study size                | 10     | Explain how the study size was arrived at                                                                                                                                            | pp4 - 5            |
| Quantitative variables    | 11     | Explain how quantitative variables were handled in the analyses. If applicable, describe which groupings were chosen and why                                                         | Pp4 - 5            |
| Statistical methods       | 12     | (a) Describe all statistical methods, including those used to control for confounding                                                                                                | p5                 |
|                           |        | (b) Describe any methods used to examine subgroups and interactions                                                                                                                  | N/A                |
|                           |        | (c) Explain how missing data were addressed                                                                                                                                          | N/A                |
|                           |        | (d) If applicable, describe analytical methods taking account of sampling strategy                                                                                                   | p5                 |
|                           |        | (e) Describe any sensitivity analyses                                                                                                                                                | N/A                |
| <b>Results</b>            |        |                                                                                                                                                                                      |                    |

|                          |     |                                                                                                                                                                                                              |                           |
|--------------------------|-----|--------------------------------------------------------------------------------------------------------------------------------------------------------------------------------------------------------------|---------------------------|
| Participants             | 13* | (a) Report numbers of individuals at each stage of study—eg numbers potentially eligible, examined for eligibility, confirmed eligible, included in the study, completing follow-up, and analysed            | p4 - 5                    |
|                          |     | (b) Give reasons for non-participation at each stage                                                                                                                                                         | N/A                       |
|                          |     | (c) Consider use of a flow diagram                                                                                                                                                                           | N/A                       |
| Descriptive data         | 14* | (a) Give characteristics of study participants (eg demographic, clinical, social) and information on exposures and potential confounders                                                                     | p6, Table 2               |
|                          |     | (b) Indicate number of participants with missing data for each variable of interest                                                                                                                          | N/A                       |
| Outcome data             | 15* | Report numbers of outcome events or summary measures                                                                                                                                                         | p6, 7 & 8, Tables 3 and 4 |
| Main results             | 16  | (a) Give unadjusted estimates and, if applicable, confounder-adjusted estimates and their precision (eg, 95% confidence interval). Make clear which confounders were adjusted for and why they were included | p6, Tables 3              |
|                          |     | (b) Report category boundaries when continuous variables were categorized                                                                                                                                    | N/A                       |
|                          |     | (c) If relevant, consider translating estimates of relative risk into absolute risk for a meaningful time period                                                                                             | N/A                       |
| Other analyses           | 17  | Report other analyses done—eg analyses of subgroups and interactions, and sensitivity analyses                                                                                                               | N/A                       |
| <b>Discussion</b>        |     |                                                                                                                                                                                                              |                           |
| Key results              | 18  | Summarise key results with reference to study objectives                                                                                                                                                     | p8 - 9                    |
| Limitations              | 19  | Discuss limitations of the study, taking into account sources of potential bias or imprecision. Discuss both direction and magnitude of any potential bias                                                   | p9                        |
| Interpretation           | 20  | Give a cautious overall interpretation of results considering objectives, limitations, multiplicity of analyses, results from similar studies, and other relevant evidence                                   | p8 - 10                   |
| Generalisability         | 21  | Discuss the generalisability (external validity) of the study results                                                                                                                                        | p9 – 10                   |
| <b>Other information</b> |     |                                                                                                                                                                                                              |                           |
| Funding                  | 22  | Give the source of funding and the role of the funders for the present study and, if applicable, for the original study on which the present article is based                                                | p10                       |

\*Give information separately for cases and controls in case-control studies and, if applicable, for exposed and unexposed groups in cohort and cross-sectional studies.

**Note:** An Explanation and Elaboration article discusses each checklist item and gives methodological background and published examples of transparent reporting. The STROBE checklist is best used in conjunction with this article (freely available on the Web sites of PLoS Medicine at <http://www.plosmedicine.org/>, Annals of Internal Medicine at <http://www.annals.org/>, and Epidemiology at <http://www.epidem.com/>). Information on the STROBE Initiative is available at [www.strobe-statement.org](http://www.strobe-statement.org).
